# Supplementary material
Source: MDPI journal article supplement (https://www.mdpi.com/2304-6740/11/3/108)
Supplement: s1 [file s1]

```
R(reflections)= 0.0283( 3591)
S = 1.015
Npar= 413
```

---

The following ALERTS were generated. Each ALERT has the format

**test-name\_ALERT\_alert-type\_alert-level.**

Click on the hyperlinks for more details of the test.

---

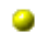

#### Alert level C

|                   |                                                  |       |        |
|-------------------|--------------------------------------------------|-------|--------|
| PLAT094_ALERT_2_C | Ratio of Maximum / Minimum Residual Density .... | 2.47  | Report |
| PLAT314_ALERT_2_C | Small Angle for H2O: Metal-O1W -H1WB .           | 89.45 | Degree |
| PLAT351_ALERT_3_C | Long C-H (X0.96,N1.08A) C7 - H7A .               | 1.12  | Ang.   |
| PLAT351_ALERT_3_C | Long C-H (X0.96,N1.08A) C9 - H9A .               | 1.12  | Ang.   |
| PLAT351_ALERT_3_C | Long C-H (X0.96,N1.08A) C10 - H10A .             | 1.14  | Ang.   |
| PLAT351_ALERT_3_C | Long C-H (X0.96,N1.08A) C10 - H10B .             | 1.15  | Ang.   |
| PLAT351_ALERT_3_C | Long C-H (X0.96,N1.08A) C10 - H10C .             | 1.15  | Ang.   |
| PLAT410_ALERT_2_C | Short Intra H...H Contact H14 ..H23 .            | 1.94  | Ang.   |
|                   | x,y,z =                                          | 1_555 | Check  |
| PLAT911_ALERT_3_C | Missing FCF Refl Between Thmin & STh/L= 0.600    | 9     | Report |

---

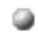

#### Alert level G

|                   |                                                  |        |       |
|-------------------|--------------------------------------------------|--------|-------|
| PLAT002_ALERT_2_G | Number of Distance or Angle Restraints on AtSite | 4      | Note  |
| PLAT005_ALERT_5_G | No Embedded Refinement Details Found in the CIF  | Please | Do !  |
| PLAT164_ALERT_4_G | Nr. of Refined C-H H-Atoms in Heavy-Atom Struct. | 22     | Note  |
| PLAT720_ALERT_4_G | Number of Unusual/Non-Standard Labels .....      | 2      | Note  |
| PLAT794_ALERT_5_G | Tentative Bond Valency for Cu1 (II) .            | 2.14   | Info  |
| PLAT802_ALERT_4_G | CIF Input Record(s) with more than 80 Characters | 1      | Info  |
| PLAT860_ALERT_3_G | Number of Least-Squares Restraints .....         | 3      | Note  |
| PLAT910_ALERT_3_G | Missing # of FCF Reflection(s) Below Theta(Min). | 1      | Note  |
| PLAT912_ALERT_4_G | Missing # of FCF Reflections Above STh/L= 0.600  | 54     | Note  |
| PLAT960_ALERT_3_G | Number of Intensities with I < - 2*sig(I) ...    | 2      | Check |
| PLAT978_ALERT_2_G | Number C-C Bonds with Positive Residual Density. | 18     | Info  |
| PLAT979_ALERT_1_G | NoSpherA2 Scattering Factors Used .....          | Please | Note  |

---

0 **ALERT level A** = Most likely a serious problem - resolve or explain  
0 **ALERT level B** = A potentially serious problem, consider carefully  
9 **ALERT level C** = Check. Ensure it is not caused by an omission or oversight  
12 **ALERT level G** = General information/check it is not something unexpected

1 ALERT type 1 CIF construction/syntax error, inconsistent or missing data  
5 ALERT type 2 Indicator that the structure model may be wrong or deficient  
9 ALERT type 3 Indicator that the structure quality may be low  
4 ALERT type 4 Improvement, methodology, query or suggestion  
2 ALERT type 5 Informative message, check

---

## Datablock: 2

---

Bond precision: C-C = 0.0020 A

Wavelength=1.54186

Cell: a=7.2566(2)

b=37.7315(9)

c=8.4952(3)

alpha=90

beta=103.354(4)

gamma=90

Temperature: 100 K

|                        | Calculated          | Reported            |
|------------------------|---------------------|---------------------|
| Volume                 | 2263.12(12)         | 2263.11(12)         |
| Space group            | P 21/c              | P 1 21/c 1          |
| Hall group             | -P 2ybc             | -P 2ybc             |
| Moiety formula         | C48 H50 Cu F6 N6 O8 | C48 H50 Cu F6 N6 O8 |
| Sum formula            | C48 H50 Cu F6 N6 O8 | C48 H50 Cu F6 N6 O8 |
| Mr                     | 1016.49             | 1016.50             |
| Dx, g cm <sup>-3</sup> | 1.492               | 1.492               |
| Z                      | 2                   | 2                   |
| Mu (mm <sup>-1</sup> ) | 1.438               | 1.438               |
| F000                   | 1054.0              | 1054.1              |
| F000'                  | 1053.65             |                     |
| h, k, lmax             | 8, 46, 10           | 8, 46, 10           |
| Nref                   | 4362                | 4298                |
| Tmin, Tmax             |                     |                     |
| Tmin'                  | 0.605               |                     |

Correction method= Not given

Data completeness= 0.985

Theta(max)= 70.850

R(reflections)= 0.0283( 3591)

wR2(reflections)=  
0.0739( 4298)

S = 1.015

Npar= 413

The following ALERTS were generated. Each ALERT has the format

**test-name\_ALERT\_alert-type\_alert-level.**

Click on the hyperlinks for more details of the test.



#### Alert level C

CRYSC01\_ALERT\_1\_C The word below has not been recognised as a standard identifier.  
greenish

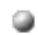

#### Alert level G

FORMU01\_ALERT\_2\_G There is a discrepancy between the atom counts in the  
\_chemical\_formula\_sum and the formula from the \_atom\_site\* data.  
Atom count from \_chemical\_formula\_sum: C46 H44 Cu1 F6.029 N8 O6  
Atom count from the \_atom\_site data: C46 H44 Cu1 F6.008 N8 O6

- 0 **ALERT level A** = Most likely a serious problem - resolve or explain
- 0 **ALERT level B** = A potentially serious problem, consider carefully
- 1 **ALERT level C** = Check. Ensure it is not caused by an omission or oversight
- 1 **ALERT level G** = General information/check it is not something unexpected

1 ALERT type 1 CIF construction/syntax error, inconsistent or missing data

1 ALERT type 2 Indicator that the structure model may be wrong or deficient  
0 ALERT type 3 Indicator that the structure quality may be low  
0 ALERT type 4 Improvement, methodology, query or suggestion  
0 ALERT type 5 Informative message, check

---

## Datablock: 3

---

Bond precision: C-C = 0.0011 Å Wavelength=1.54186  
Cell: a=7.9338(1) b=10.2793(2) c=28.5066(5)  
alpha=90 beta=94.659(1) gamma=90  
Temperature: 100 K

|                        | Calculated           | Reported             |
|------------------------|----------------------|----------------------|
| Volume                 | 2317.14(7)           | 2317.14(7)           |
| Space group            | P 21/n               | P 1 21/n 1           |
| Hall group             | -P 2yn               | -P 2ybc (x-          |
| Moiety formula         | C48 H54 Cl2 Cu N6 O8 | C48 H54 Cl2 Cu N6 O8 |
| Sum formula            | C48 H54 Cl2 Cu N6 O8 | C48 H54 Cl2 Cu N6 O8 |
| Mr                     | 977.42               | 977.45               |
| Dx, g cm <sup>-3</sup> | 1.401                | 1.401                |
| Z                      | 2                    | 2                    |
| Mu (mm <sup>-1</sup> ) | 2.224                | 2.224                |
| F000                   | 1022.0               | 1022.7               |
| F000'                  | 1022.26              |                      |
| h, k, lmax             | 9, 12, 35            | 9, 12, 34            |
| Nref                   | 4517                 | 4473                 |
| Tmin, Tmax             | 0.482, 0.573         | 0.067, 0.443         |
| Tmin'                  | 0.437                |                      |

Correction method= # Reported T Limits: Tmin=0.067 Tmax=0.443  
AbsCorr = MULTI-SCAN

Data completeness= 0.990 Theta(max)= 71.660

R(reflections)= 0.0191( 4148) wR2(reflections)=  
0.0486( 4473)  
S = 1.064 Npar= 455

---

The following ALERTS were generated. Each ALERT has the format  
**test-name\_ALERT\_alert-type\_alert-level.**  
Click on the hyperlinks for more details of the test.

---

### ● Alert level C

|                   |                                                  |         |          |
|-------------------|--------------------------------------------------|---------|----------|
| PLAT088_ALERT_3_C | Poor Data / Parameter Ratio .....                | 9.83    | Note     |
| PLAT126_ALERT_1_C | Error in or Uninterpretable Hall Symbol .....    | -P 2YBC | (X Check |
| PLAT314_ALERT_2_C | Small Angle for H2O: Metal-O1W -H1WA .           | 87.94   | Degree   |
| PLAT351_ALERT_3_C | Long C-H (X0.96,N1.08A) C8 - H8A .               | 1.12    | Ang.     |
| PLAT911_ALERT_3_C | Missing FCF Refl Between Thmin & STh/L= 0.600    | 3       | Report   |
| PLAT918_ALERT_3_C | Reflection(s) with I(obs) much Smaller I(calc) . | 1       | Check    |

### ● Alert level G

|                   |                                                  |       |              |
|-------------------|--------------------------------------------------|-------|--------------|
| PLAT002_ALERT_2_G | Number of Distance or Angle Restraints on AtSite | 53    | Note         |
| PLAT003_ALERT_2_G | Number of Uiso or Uij Restrained non-H Atoms ... | 48    | Report       |
| PLAT005_ALERT_5_G | No Embedded Refinement Details Found in the CIF  |       | Please Do !  |
| PLAT068_ALERT_1_G | Reported F000 Differs from Calcd (or Missing)... |       | Please Check |
| PLAT164_ALERT_4_G | Nr. of Refined C-H H-Atoms in Heavy-Atom Struct. | 14    | Note         |
| PLAT230_ALERT_2_G | Hirshfeld Test Diff for C21 --C22 .              | 7.0   | s.u.         |
| PLAT232_ALERT_2_G | Hirshfeld Test Diff (M-X) Cu1 --O1 .             | 9.0   | s.u.         |
| PLAT232_ALERT_2_G | Hirshfeld Test Diff (M-X) Cu1 --O1W .            | 14.0  | s.u.         |
| PLAT301_ALERT_3_G | Main Residue Disorder .....(Resd 1 )             | 46%   | Note         |
| PLAT720_ALERT_4_G | Number of Unusual/Non-Standard Labels .....      | 3     | Note         |
| PLAT779_ALERT_4_G | Suspect or Irrelevant (Bond) Angle(s) in CIF ... | 11.80 | Deg.         |
|                   | C12A -C11 -C12 1_555 1_555 1_555 ..... #         | 70    | Check        |
| PLAT794_ALERT_5_G | Tentative Bond Valency for Cu1 (II) .            | 2.13  | Info         |
| PLAT802_ALERT_4_G | CIF Input Record(s) with more than 80 Characters | 1     | Info         |
| PLAT811_ALERT_5_G | No ADDSYM Analysis: Too Many Excluded Atoms .... |       | ! Info       |
| PLAT860_ALERT_3_G | Number of Least-Squares Restraints .....         | 112   | Note         |
| PLAT912_ALERT_4_G | Missing # of FCF Reflections Above STh/L= 0.600  | 41    | Note         |
| PLAT960_ALERT_3_G | Number of Intensities with I < - 2*sig(I) ...    | 1     | Check        |
| PLAT978_ALERT_2_G | Number C-C Bonds with Positive Residual Density. | 17    | Info         |
| PLAT979_ALERT_1_G | NoSpherA2 Scattering Factors Used .....          |       | Please Note  |

0 **ALERT level A** = Most likely a serious problem - resolve or explain  
0 **ALERT level B** = A potentially serious problem, consider carefully  
6 **ALERT level C** = Check. Ensure it is not caused by an omission or oversight  
19 **ALERT level G** = General information/check it is not something unexpected

3 ALERT type 1 CIF construction/syntax error, inconsistent or missing data  
7 ALERT type 2 Indicator that the structure model may be wrong or deficient  
7 ALERT type 3 Indicator that the structure quality may be low  
5 ALERT type 4 Improvement, methodology, query or suggestion  
3 ALERT type 5 Informative message, check

## Datablock: 4

No errors found in this datablock

Bond precision: C-C = 0.0011 A

Wavelength=1.54186

Cell: a=7.9338(1)

b=10.2793(2)

c=28.5066(5)

alpha=90

beta=94.659(1)

gamma=90

Temperature: 100 K

|                        | Calculated           | Reported             |
|------------------------|----------------------|----------------------|
| Volume                 | 2317.14 (7)          | 2317.14 (7)          |
| Space group            | P 21/n               | P 1 21/n 1           |
| Hall group             | -P 2yn               | -P 2ybc (x-          |
| Moiety formula         | C48 H54 Cl2 Cu N6 O8 | C48 H54 Cl2 Cu N6 O8 |
| Sum formula            | C48 H54 Cl2 Cu N6 O8 | C48 H54 Cl2 Cu N6 O8 |
| Mr                     | 977.42               | 977.45               |
| Dx, g cm <sup>-3</sup> | 1.401                | 1.401                |
| Z                      | 2                    | 2                    |
| Mu (mm <sup>-1</sup> ) | 2.224                | 2.224                |
| F000                   | 1022.0               | 1022.7               |
| F000'                  | 1022.26              |                      |
| h, k, lmax             | 9, 12, 35            | 9, 12, 34            |
| Nref                   | 4517                 | 4473                 |
| Tmin, Tmax             |                      |                      |
| Tmin'                  | 0.437                |                      |

Correction method= Not given

Data completeness= 0.990

Theta(max)= 71.660

R(reflections)= 0.0191 ( 4148)

wR2(reflections)=  
0.0486 ( 4473)

S = 1.064

Npar= 455

## Datablock: 5

Bond precision: C-C = 0.0017 A

Wavelength=1.54186

Cell: a=7.8787 (1)

b=10.3607 (3)

c=28.6114 (5)

alpha=90

beta=94.888 (1)

gamma=90

Temperature:

100 K



|                   |                                                  |       |              |
|-------------------|--------------------------------------------------|-------|--------------|
| PLAT068_ALERT_1_G | Reported F000 Differs from Calcd (or Missing)... |       | Please Check |
| PLAT164_ALERT_4_G | Nr. of Refined C-H H-Atoms in Heavy-Atom Struct. | 14    | Note         |
| PLAT230_ALERT_2_G | Hirshfeld Test Diff for C19 --C24 .              | 5.6   | s.u.         |
| PLAT232_ALERT_2_G | Hirshfeld Test Diff (M-X) Cu1 --O1 .             | 5.5   | s.u.         |
| PLAT232_ALERT_2_G | Hirshfeld Test Diff (M-X) Cu1 --O1W .            | 6.5   | s.u.         |
| PLAT301_ALERT_3_G | Main Residue Disorder .....(Resd 1 )             | 46%   | Note         |
| PLAT720_ALERT_4_G | Number of Unusual/Non-Standard Labels .....      | 3     | Note         |
| PLAT779_ALERT_4_G | Suspect or Irrelevant (Bond) Angle(s) in CIF ... | 13.60 | Deg.         |
|                   | C12A -C11 -C12 1_555 1_555 1_555 ..... #         | 70    | Check        |
| PLAT794_ALERT_5_G | Tentative Bond Valency for Cu1 (II) .            | 2.12  | Info         |
| PLAT802_ALERT_4_G | CIF Input Record(s) with more than 80 Characters | 1     | Info         |
| PLAT811_ALERT_5_G | No ADDSYM Analysis: Too Many Excluded Atoms .... | !     | Info         |
| PLAT860_ALERT_3_G | Number of Least-Squares Restraints .....         | 207   | Note         |
| PLAT912_ALERT_4_G | Missing # of FCF Reflections Above STh/L= 0.600  | 94    | Note         |
| PLAT978_ALERT_2_G | Number C-C Bonds with Positive Residual Density. | 14    | Info         |
| PLAT979_ALERT_1_G | NoSpherA2 Scattering Factors Used .....          |       | Please Note  |

---

0 **ALERT level A** = Most likely a serious problem - resolve or explain  
 0 **ALERT level B** = A potentially serious problem, consider carefully  
 11 **ALERT level C** = Check. Ensure it is not caused by an omission or oversight  
 18 **ALERT level G** = General information/check it is not something unexpected

3 ALERT type 1 CIF construction/syntax error, inconsistent or missing data  
 7 ALERT type 2 Indicator that the structure model may be wrong or deficient  
 11 ALERT type 3 Indicator that the structure quality may be low  
 5 ALERT type 4 Improvement, methodology, query or suggestion  
 3 ALERT type 5 Informative message, check

---



---



It is advisable to attempt to resolve as many as possible of the alerts in all categories. Often the minor alerts point to easily fixed oversights, errors and omissions in your CIF or refinement strategy, so attention to these fine details can be worthwhile. In order to resolve some of the more serious problems it may be necessary to carry out additional measurements or structure refinements. However, the purpose of your study may justify the reported deviations and the more serious of these should normally be commented upon in the discussion or experimental section of a paper or in the "special\_details" fields of the CIF. checkCIF was carefully designed to identify outliers and unusual parameters, but every test has its limitations and alerts that are not important in a particular case may appear. Conversely, the absence of alerts does not guarantee there are no aspects of the results needing attention. It is up to the individual to critically assess their own results and, if necessary, seek expert advice.

### **Publication of your CIF in IUCr journals**

A basic structural check has been run on your CIF. These basic checks will be run on all CIFs submitted for publication in IUCr journals (*Acta Crystallographica*, *Journal of Applied Crystallography*, *Journal of Synchrotron Radiation*); however, if you intend to submit to *Acta Crystallographica Section C* or *E* or *IUCrData*, you should make sure that full publication checks are run on the final version of your CIF prior to submission.

### **Publication of your CIF in other journals**

Please refer to the *Notes for Authors* of the relevant journal for any special instructions relating to CIF submission.
