# Supplementary material
Source: MDPI journal article supplement (https://www.mdpi.com/2304-6740/11/3/108)
Supplement: s1 [file s1]

ESI

# Structural and biological properties of copper fenamates with diethylnicotinamide: Preparation, structure, spectral properties and Hirshfeld surface analysis

Milan Piroš<sup>1</sup>, Martin Schoeller<sup>1</sup>, Katarína Koňariková<sup>2</sup>, Jindra Valentová<sup>3</sup>, Ľubomír Švorc<sup>4</sup>, Ján Moncol<sup>1</sup>, Marian Valko<sup>5</sup> and Jozef Švorec<sup>1,\*</sup>

<sup>1</sup> Department of Inorganic Chemistry, Faculty of Chemical and Food Technology, Slovak University of Technology, Radlinského 9, 81237 Bratislava, Slovakia;

<sup>2</sup> Institute of Medicinal Chemistry, Biochemistry and Clinical Biochemistry, Faculty of Medicine, Comenius University, Sasinkova 2, 81372 Bratislava, Slovakia;

<sup>3</sup> Department of Chemical Theory of Drugs, Faculty of Pharmacy, Comenius University in Bratislava, Kalinčiakova 8, 83232 Bratislava, Slovakia;

<sup>4</sup> Institute of Analytical Chemistry, Faculty of Chemical and Food Technology, Slovak University of Technology, Radlinského 9, 81237 Bratislava, Slovakia;

<sup>5</sup> Department of Physical Chemistry, Faculty of Chemical and Food Technology, Slovak University of Technology, Radlinského 9, 81237 Bratislava, Slovakia;

\* Correspondence: jozef.svorec@stuba.sk; Tel.: +421-2-59325-625

**Table S1.** Selected hydrogen-bond parameters for 1–5.

| <i>D</i> —H... <i>A</i>     | <i>D</i> —H (Å) | H... <i>A</i> (Å) | <i>D</i> ... <i>A</i> (Å) | <i>D</i> —H... <i>A</i> (°) |
|-----------------------------|-----------------|-------------------|---------------------------|-----------------------------|
| <b>1</b>                    |                 |                   |                           |                             |
| O1—H1WA...O2 <sup>i</sup>   | 0.90(2)         | 1.85(2)           | 2.7289(15)                | 166(2)                      |
| O1—H1WB...O3 <sup>ii</sup>  | 0.92(3)         | 1.95(3)           | 2.8533(16)                | 168(2)                      |
| N3—H3...O2                  | 0.98(2)         | 1.79(2)           | 2.6310(16)                | 142(2)                      |
| C14—H14...F2 <sup>iii</sup> | 1.05(2)         | 2.42(2)           | 3.1950(17)                | 131(1)                      |
| <b>3</b>                    |                 |                   |                           |                             |
| O1—H1WA...O2 <sup>iv</sup>  | 0.93(1)         | 1.84(1)           | 2.7386(8)                 | 161(1)                      |
| O1—H1WB...O3 <sup>v</sup>   | 0.93(1)         | 1.88(1)           | 2.7993(8)                 | 167(1)                      |
| N3—H3A...O2                 | 1.03(1)         | 1.80(2)           | 2.6429(10)                | 137(1)                      |
| N3A—H3AA...O2A              | 1.02(2)         | 1.83(5)           | 2.537(6)                  | 123(4)                      |
| <b>5</b>                    |                 |                   |                           |                             |
| O1—H1WA...O2 <sup>iv</sup>  | 0.95(2)         | 1.81(2)           | 2.7282(11)                | 163(1)                      |
| O1—H1WB...O3 <sup>v</sup>   | 0.96(2)         | 1.89(2)           | 2.8279(12)                | 168(1)                      |
| N3—H3A...O2                 | 1.02(2)         | 1.80(2)           | 2.6577(19)                | 139(2)                      |
| N3A—H3AA...O2A              | 1.01(2)         | 1.78(5)           | 2.528(6)                  | 133(5)                      |
| <b>2</b>                    |                 |                   |                           |                             |
| N3—H3...O2                  | 1.00(1)         | 1.82(1)           | 2.6692(11)                | 141(1)                      |
| C3—H3A...O3 <sup>i</sup>    | 1.07(1)         | 2.45(1)           | 3.2141(12)                | 128(1)                      |
| C4—H4...O3 <sup>vi</sup>    | 1.06(1)         | 2.66(1)           | 3.4789(12)                | 134(1)                      |
| C21—H21...O3 <sup>vii</sup> | 1.06(1)         | 2.39(1)           | 3.4356(17)                | 170(1)                      |
| C23—H23...N4                | 1.09(1)         | 2.24(1)           | 2.9129(14)                | 118(1)                      |
| <b>4</b>                    |                 |                   |                           |                             |
| N3—H3...O2                  | 1.01(2)         | 1.81(2)           | 2.6725(15)                | 142(2)                      |
| C3—H3A...O3 <sup>viii</sup> | 1.08(2)         | 2.44(2)           | 3.1999(18)                | 126(1)                      |
| C4—H4...O3 <sup>ix</sup>    | 1.09(2)         | 2.42(2)           | 3.2810(17)                | 135(1)                      |
| C21—H21...O3 <sup>x</sup>   | 1.06(2)         | 2.43(2)           | 3.4356(18)                | 158(2)                      |
| C23—H23...N4                | 1.04(2)         | 2.21(2)           | 2.8988(19)                | 122(1)                      |

Symmetry codes: (i) 1-*x*, 1-*y*, 2-*z*; (ii) 1+*x*, +*y*, 1+*z*; (iii) 1+*x*, 1/2-*y*, 1/2+*z*; (iv) 1-*x*, 1-*y*, 1-*z*; (v) +*x*, 1+*y*, +*z*; (vi) 1+*x*, +*y*, +*z*; (vii) 1-*x*, 2-*y*, 1-*z*; (viii) 1-*x*, 1-*y*, -*z*; (ix) -1+*x*, +*y*, +*z*; (x) 1-*x*, -*y*, 1-*z*.

a)

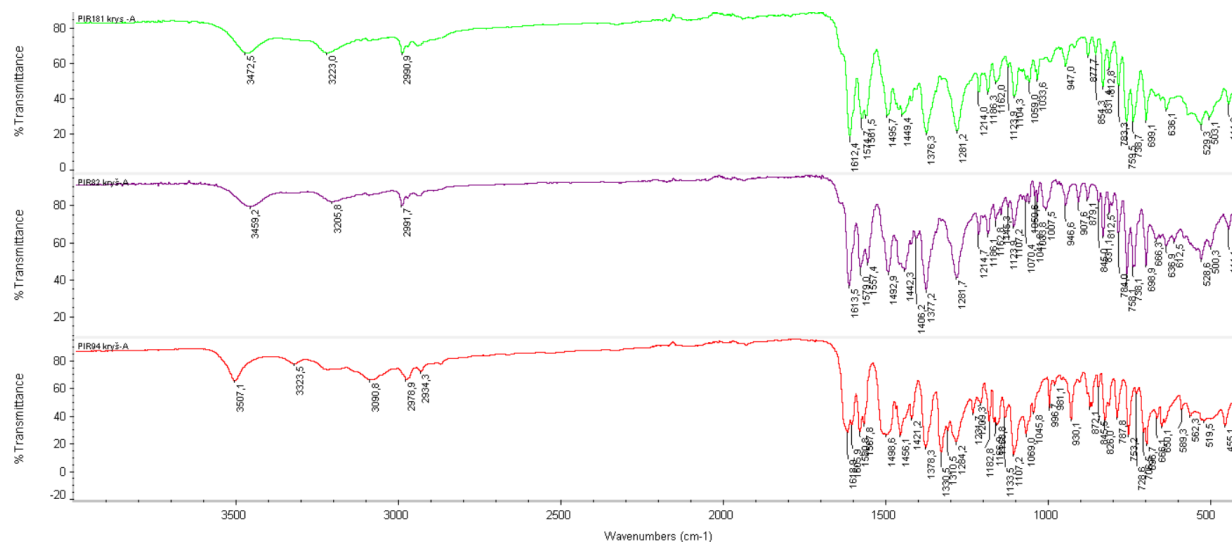

b)

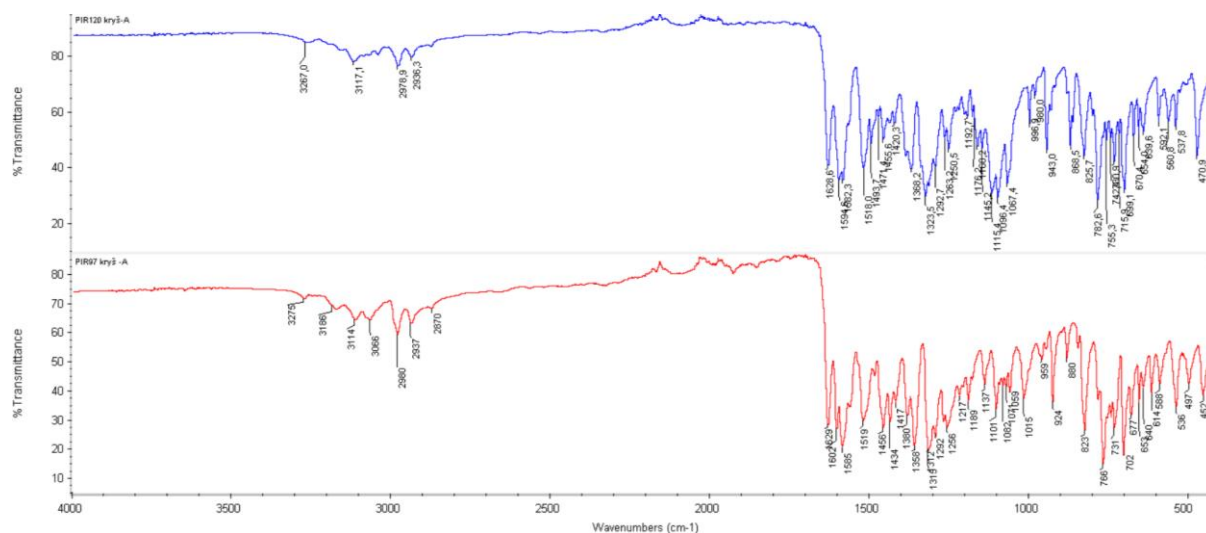

Figure S1. ATR IR spectra of solid samples of a) complexes 1, 3, 5; b) complexes 2 and 4.

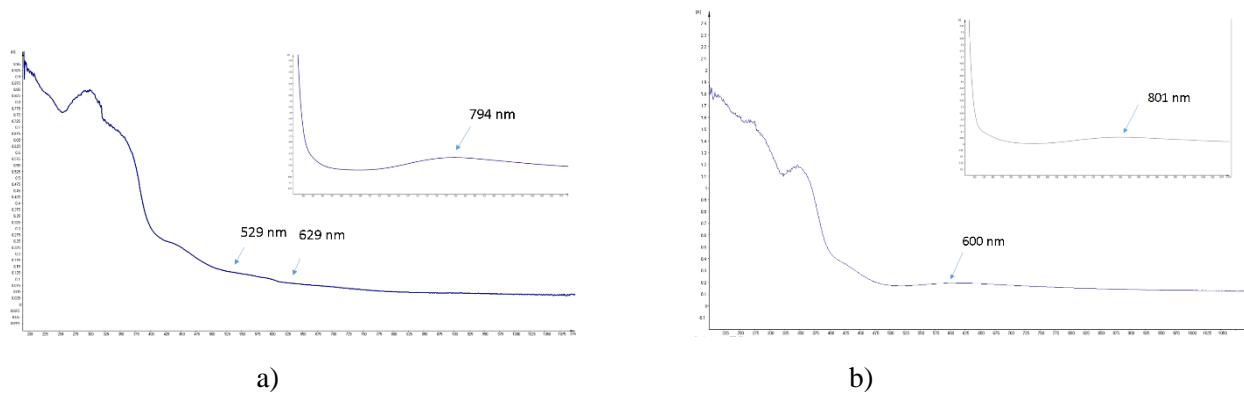

Figure S2. UV-Vis spectrum of nujol mulls of a) 4 and b) 5. Inset: d-d transition of DMSO solutions.

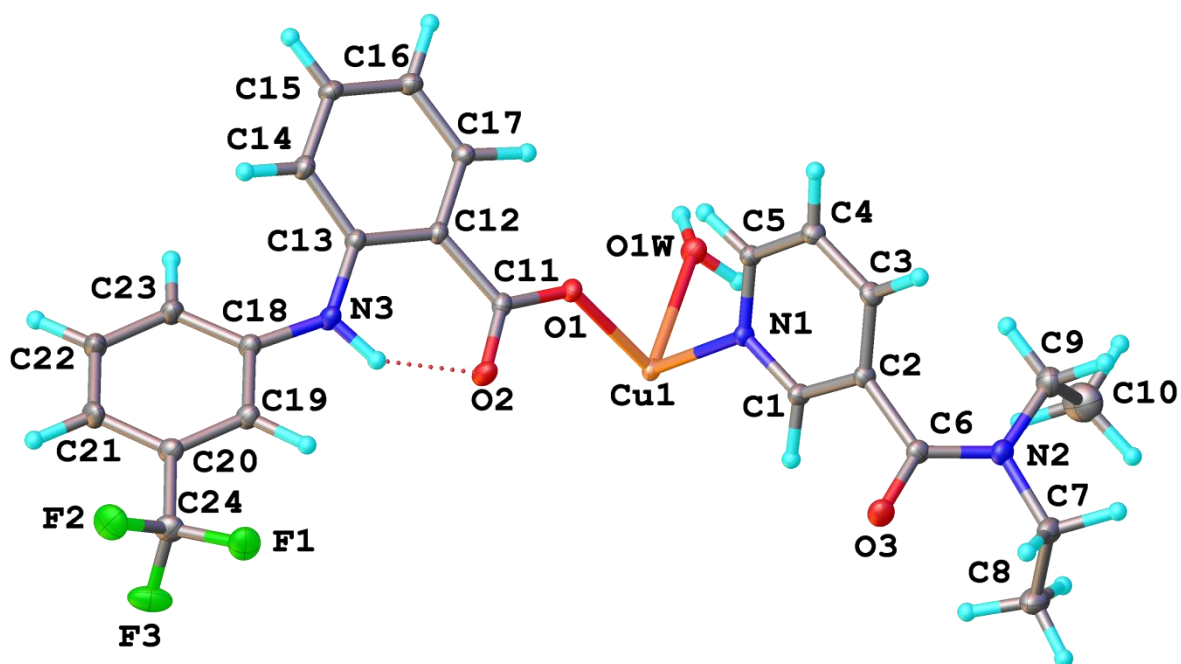

Figure S3. ORTEP-like representation of the asymmetric part of the crystal structure of complex 1.

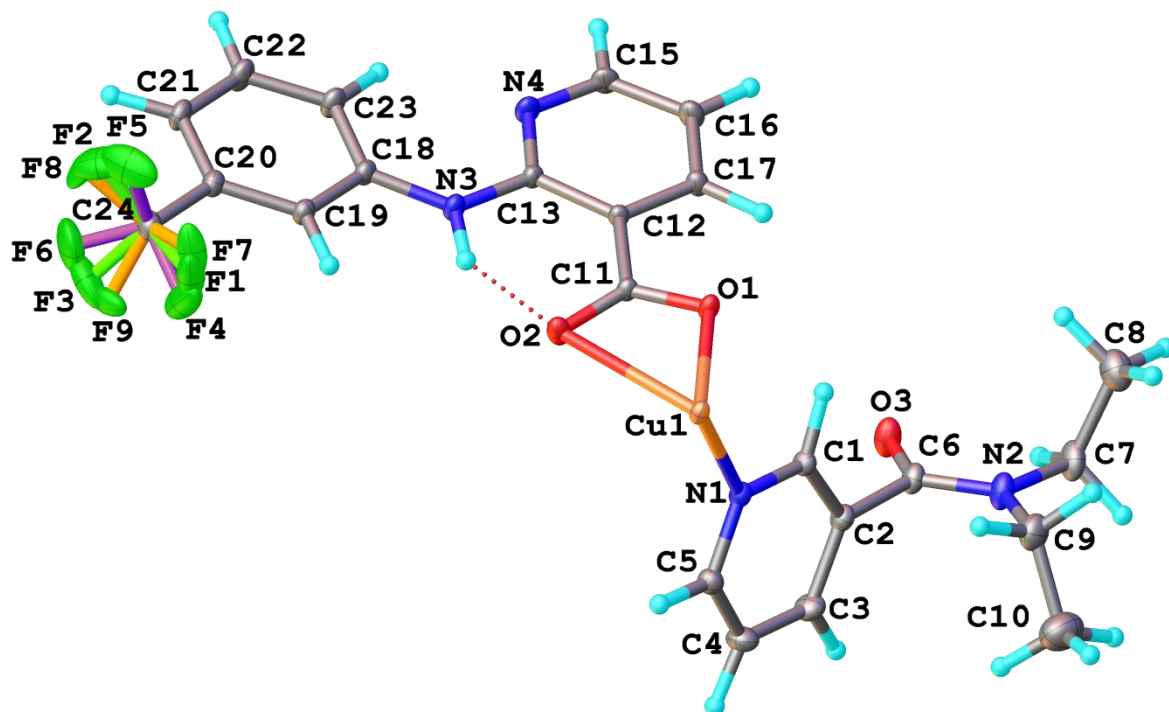

Figure S4. ORTEP-like representation of the asymmetric part of the crystal structure of 2.

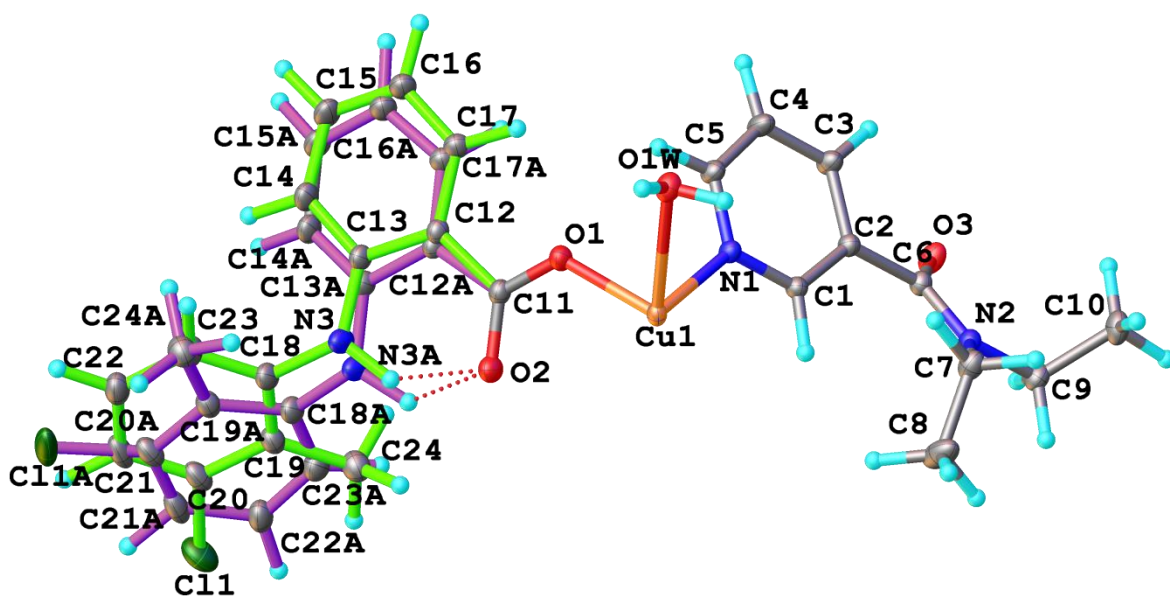

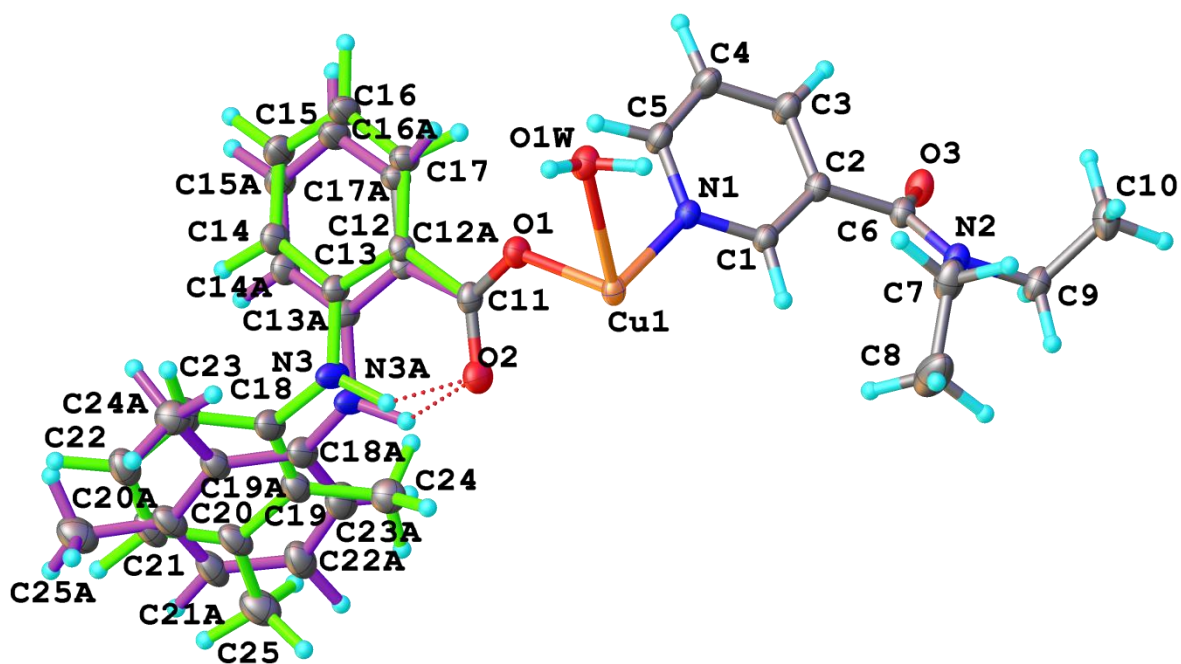

Figure S7. ORTEP-like representation of the asymmetric part of the crystal structure of 5.

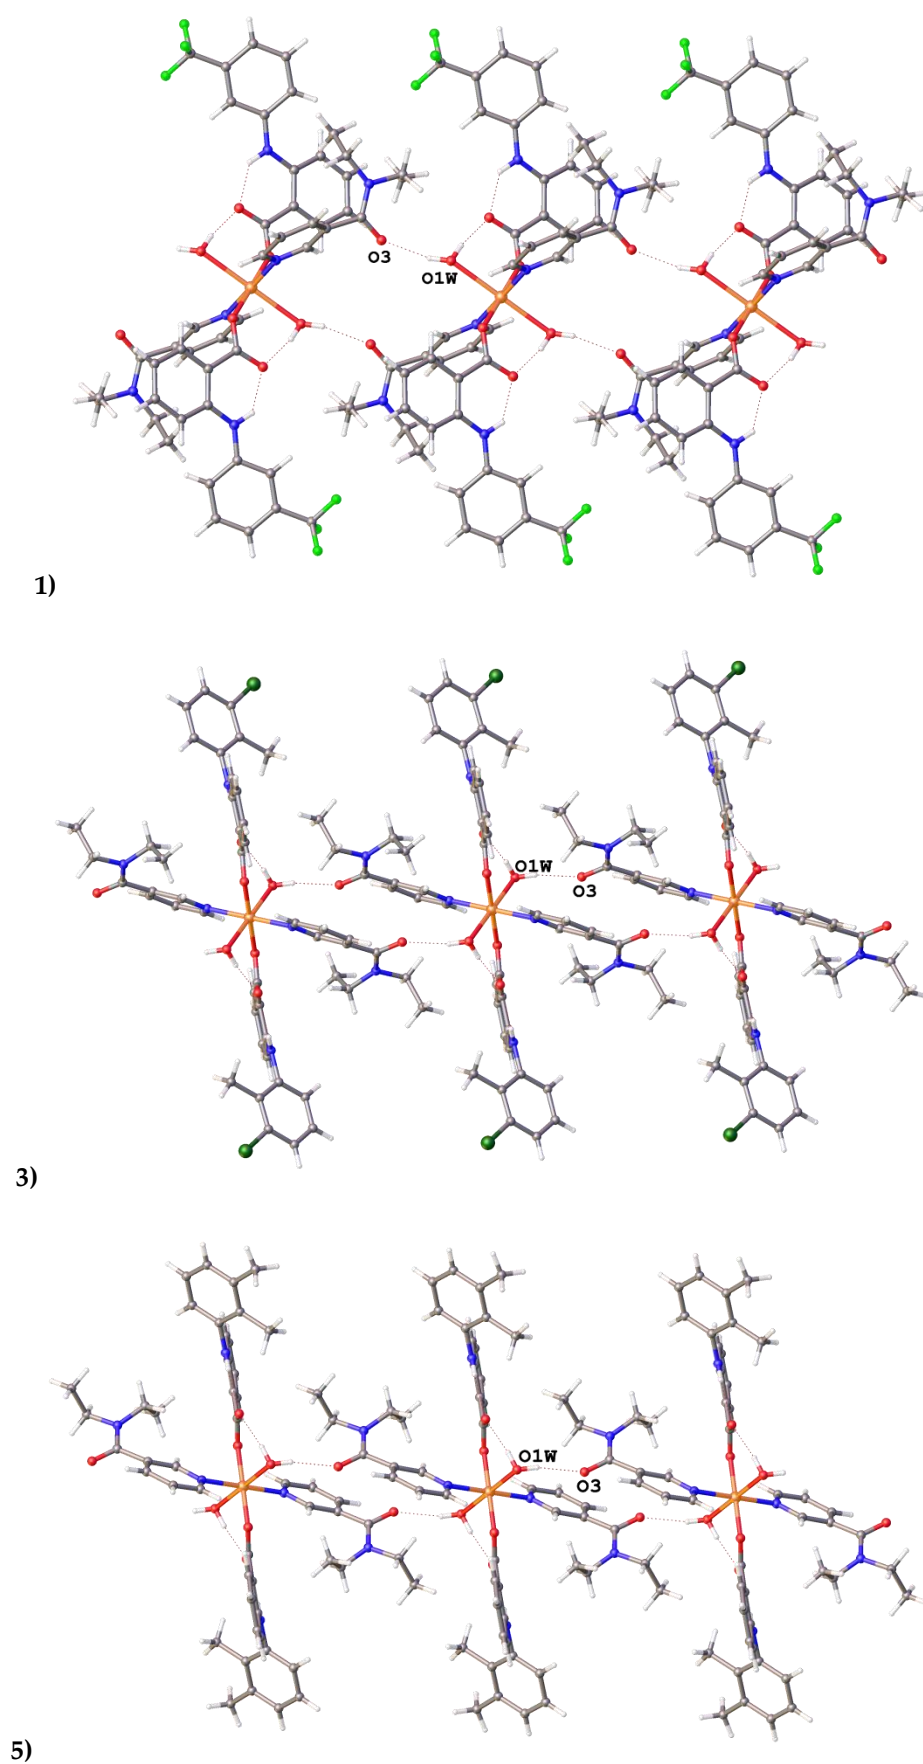

**Figure S8.** Comparison of 1D supramolecular chains formed by O–H...O hydrogen bonds in the crystal structure of 1, 3 and 5.

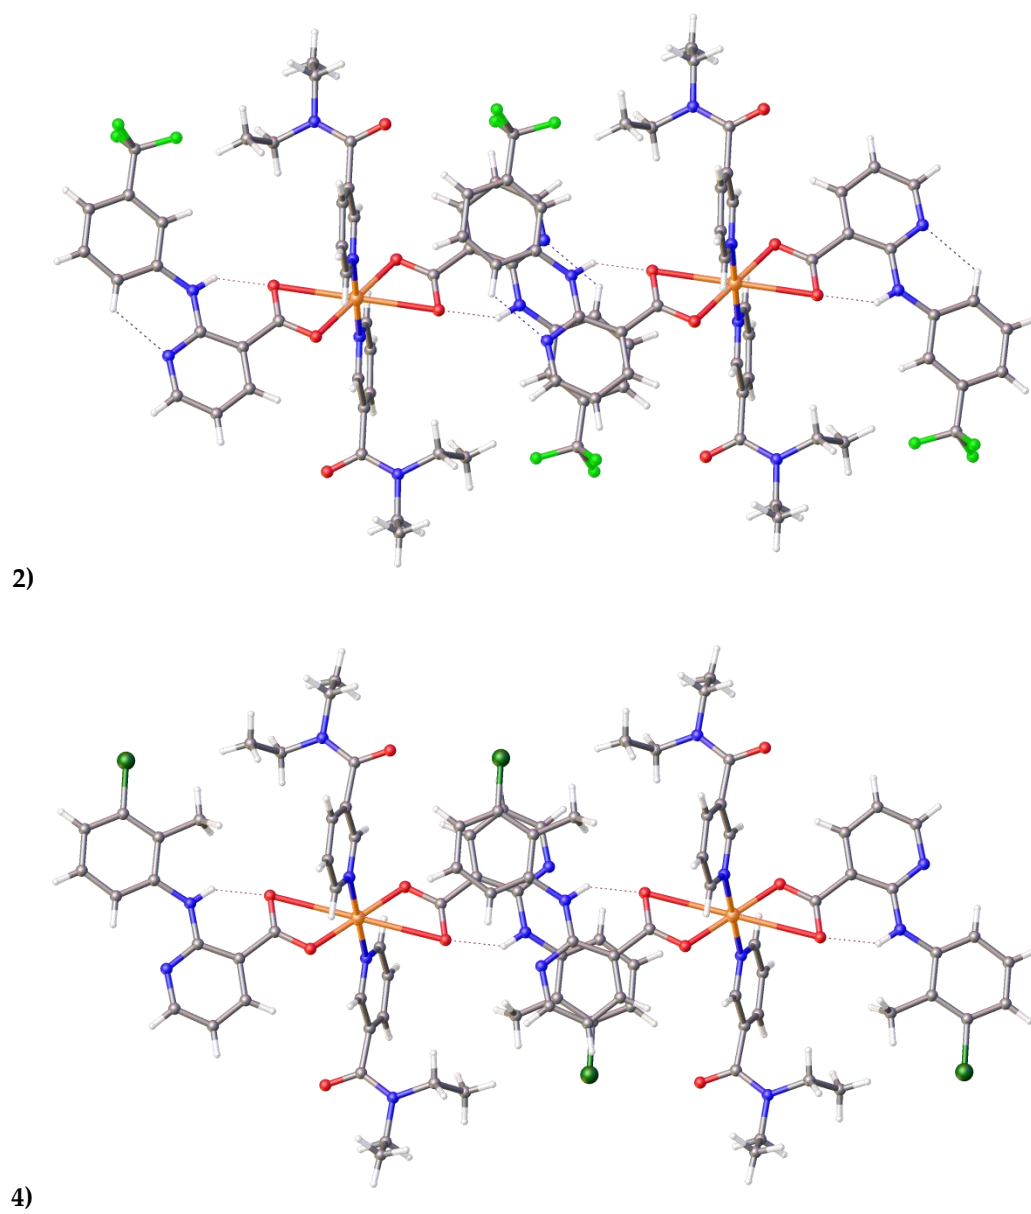

**Figure S9.** Comparison of  $\pi$ - $\pi$  stacking interactions in the crystal structure of **2** and **4**.



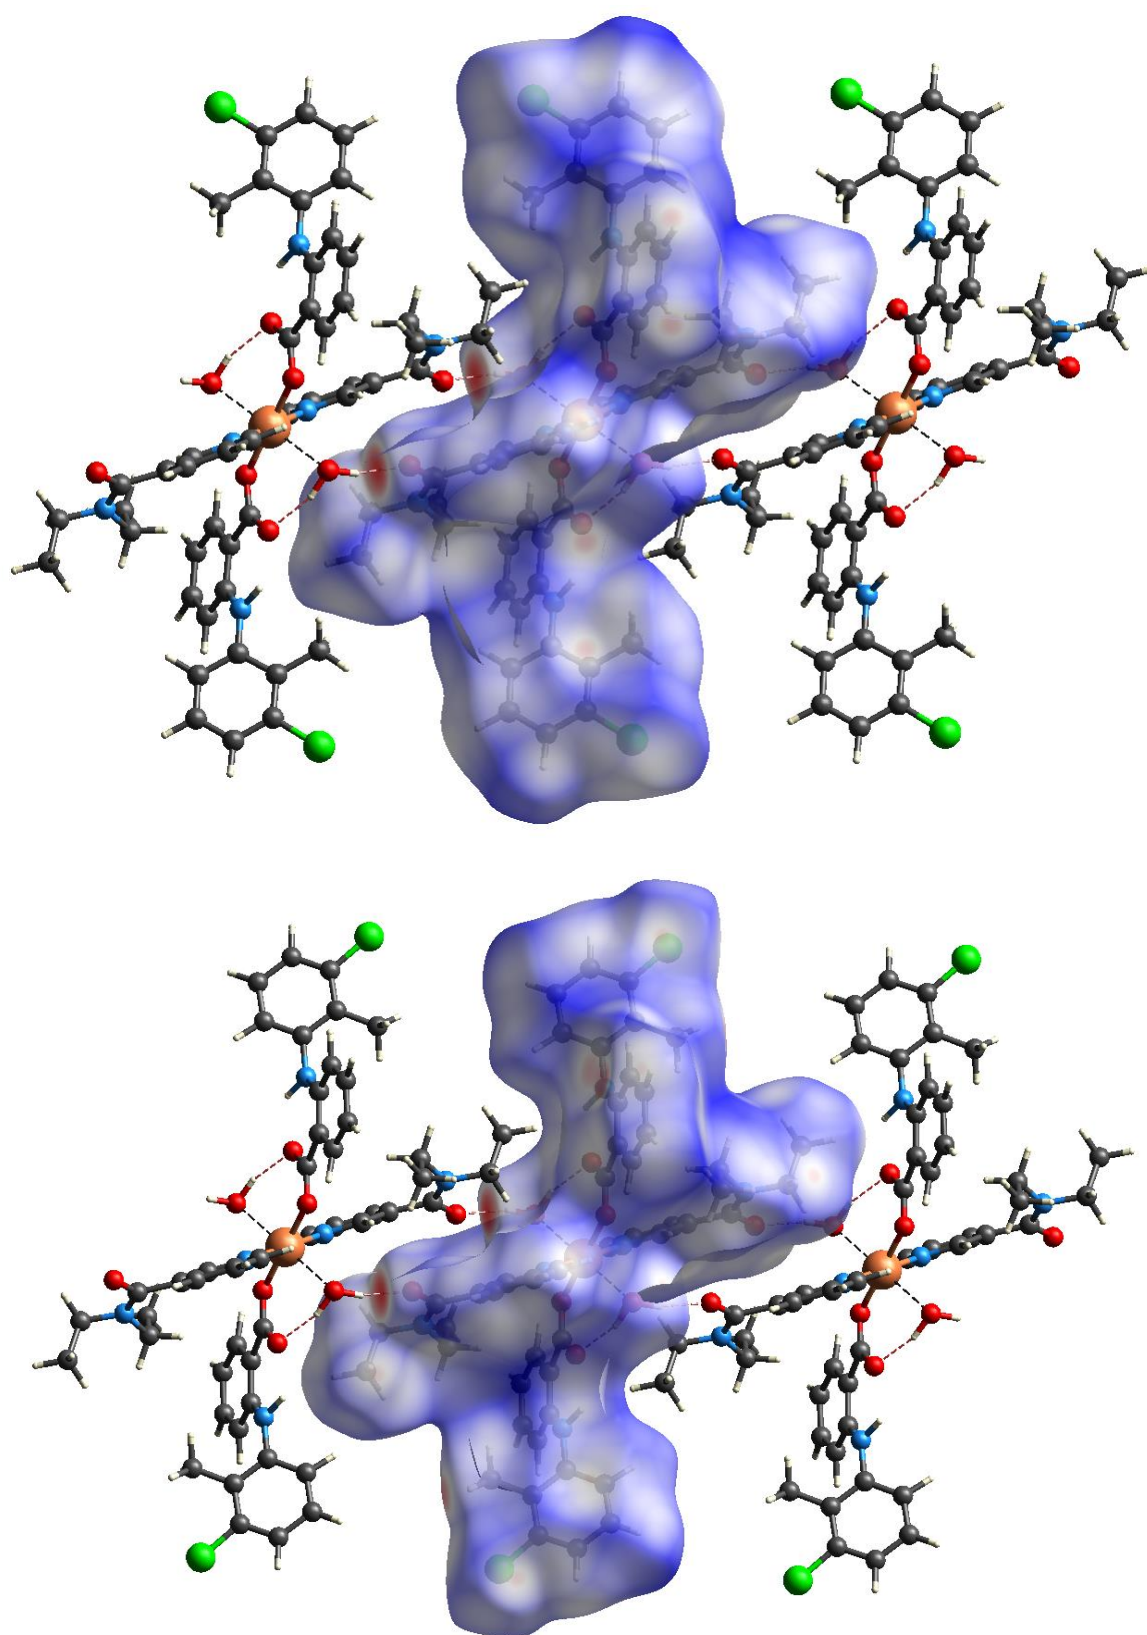

**Figure S10.** View of the three-dimensional Hirshfeld surface of **3** plotted over  $d_{\text{norm}}$  in the range - 0.6001 to 1.3768 a.u. The Hirshfeld surfaces are shown separately for the main (top) and minor (bottom) part of the disorder.

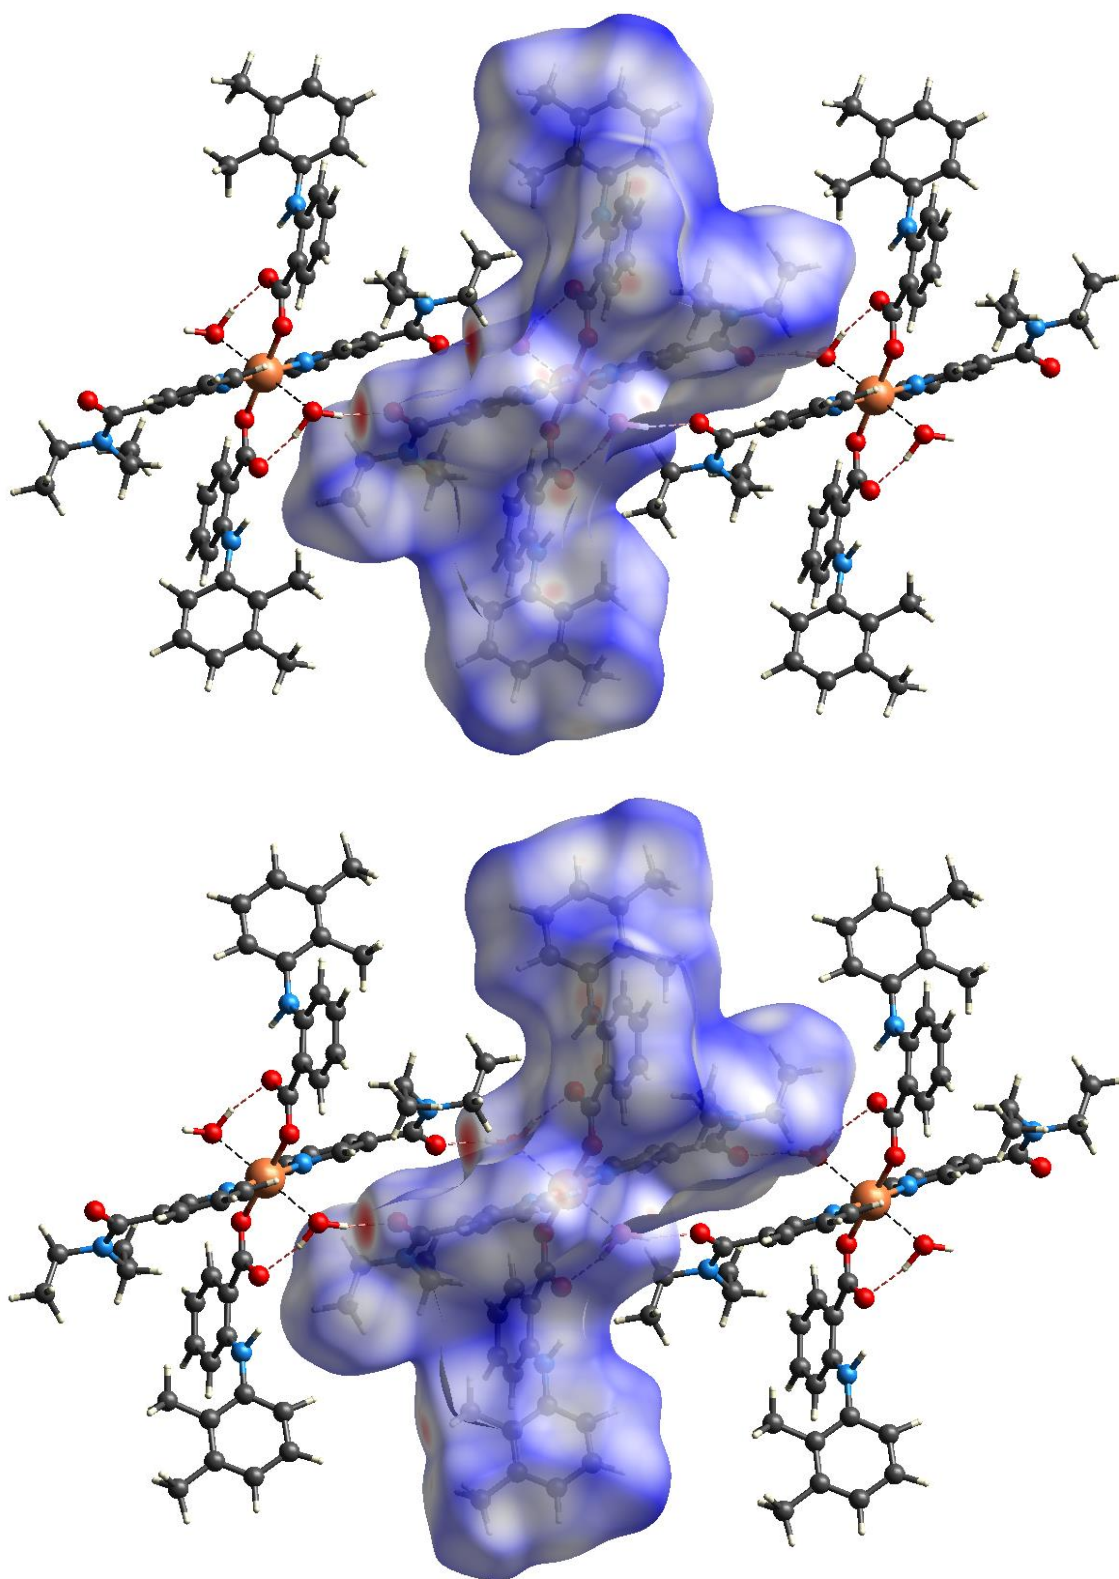

**Figure S11.** View of the three-dimensional Hirshfeld surface of **5** plotted over  $d_{\text{norm}}$  in the range -0.5814 to 1.4120 a.u. The Hirshfeld surfaces are shown separately for the main (top) and minor (bottom) part of the disorder.

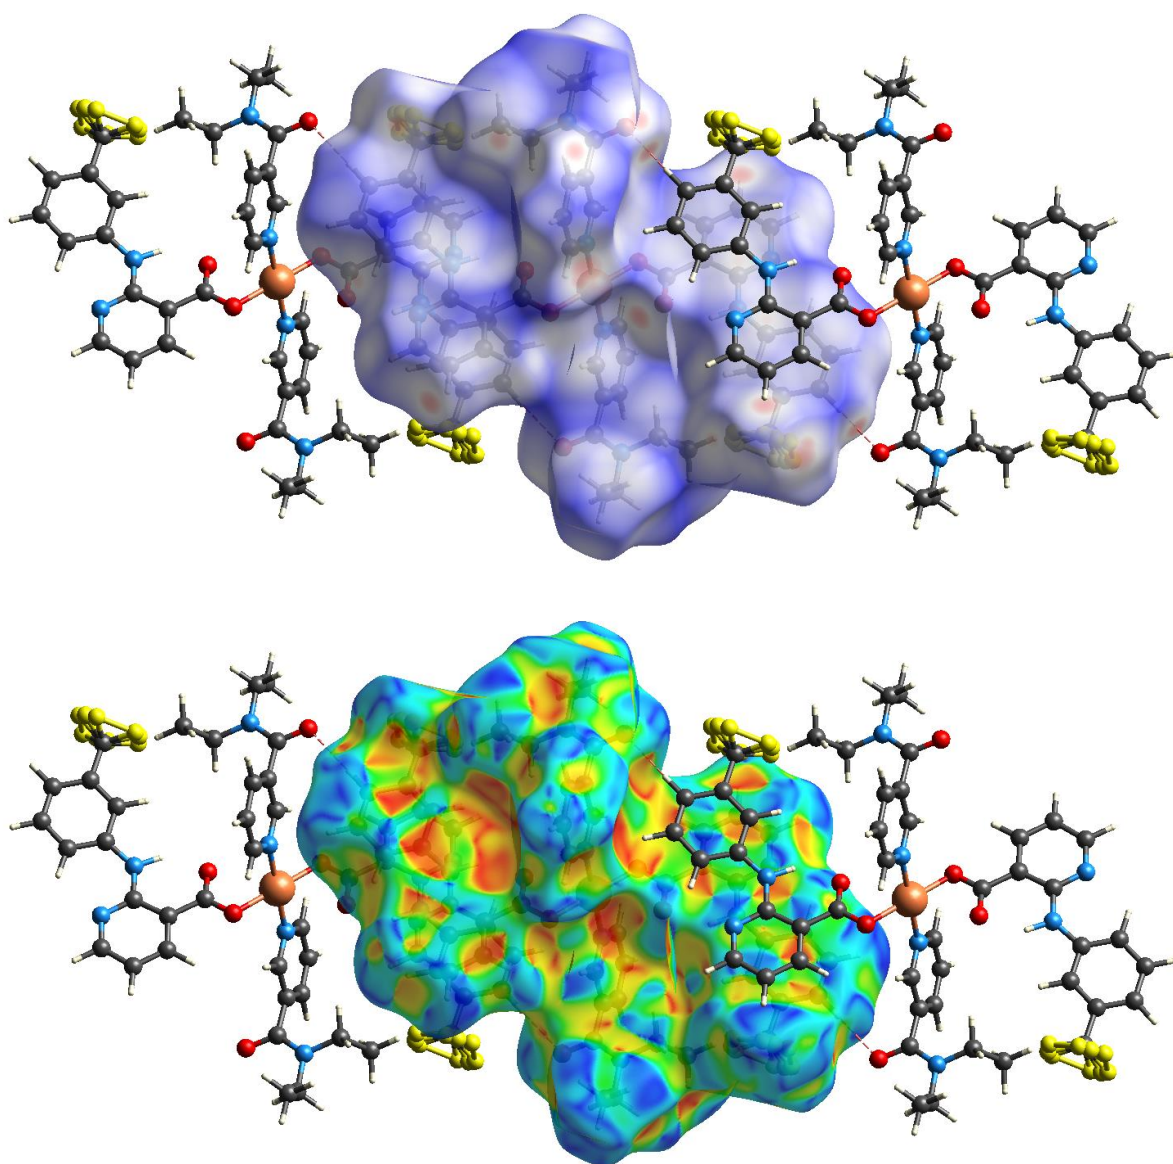

**Figure S12.** View of the three-dimensional Hirshfeld surface of **2** plotted over  $d_{\text{norm}}$  in the range - 0.5000 to 1.4110 a.u. (top) and shape-index (bottom).



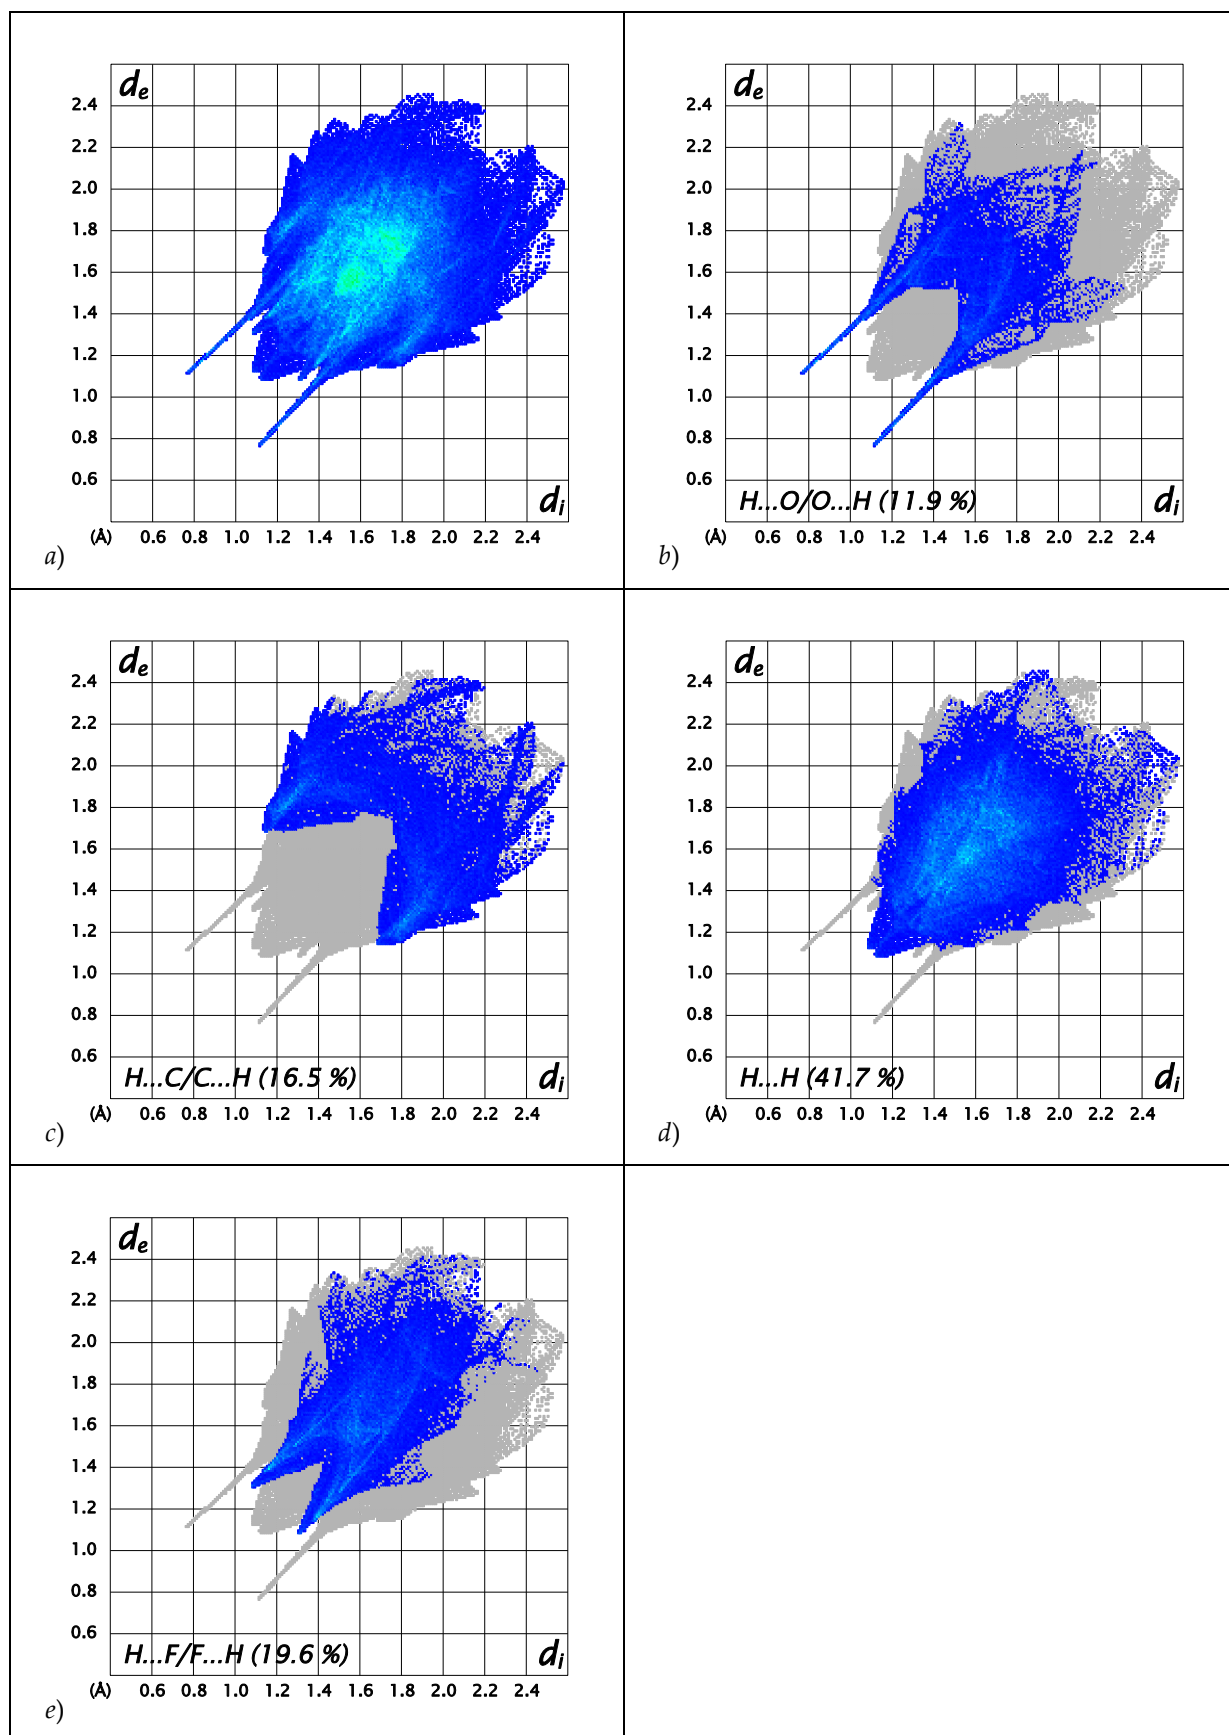

**Figure S13.** The full two-dimensional fingerprint plots of **1**, showing (a) all interactions, (b)  $H\cdots O/O\cdots H$ , (c)  $H\cdots C/C\cdots H$ , (d)  $H\cdots H$  and (e)  $H\cdots F/F\cdots H$  interactions.

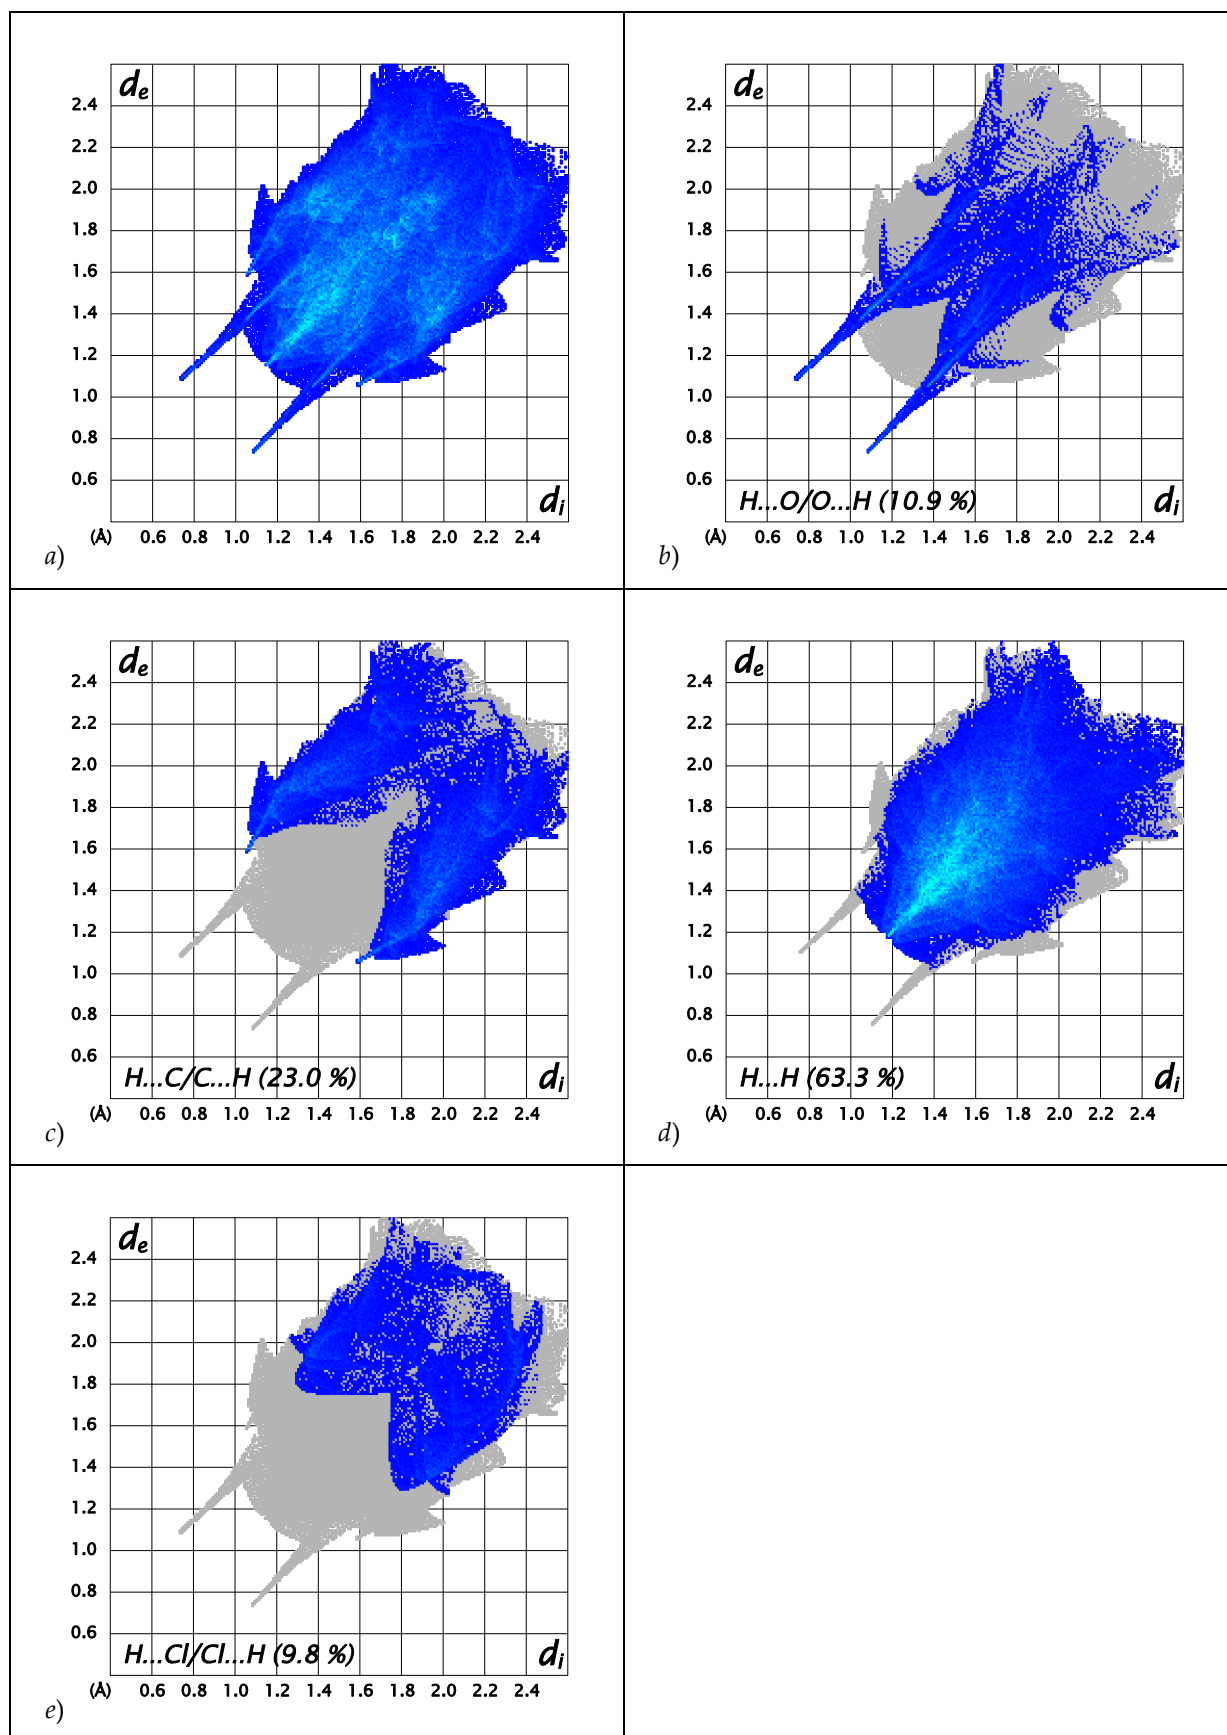

**Figure S14.** The full two-dimensional fingerprint plots of **3** (main part), showing (a) all interactions, (b)  $H\cdots O/O\cdots H$ , (c)  $H\cdots C/C\cdots H$ , (d)  $H\cdots H$  and (e)  $H\cdots Cl/Cl\cdots H$  interactions.

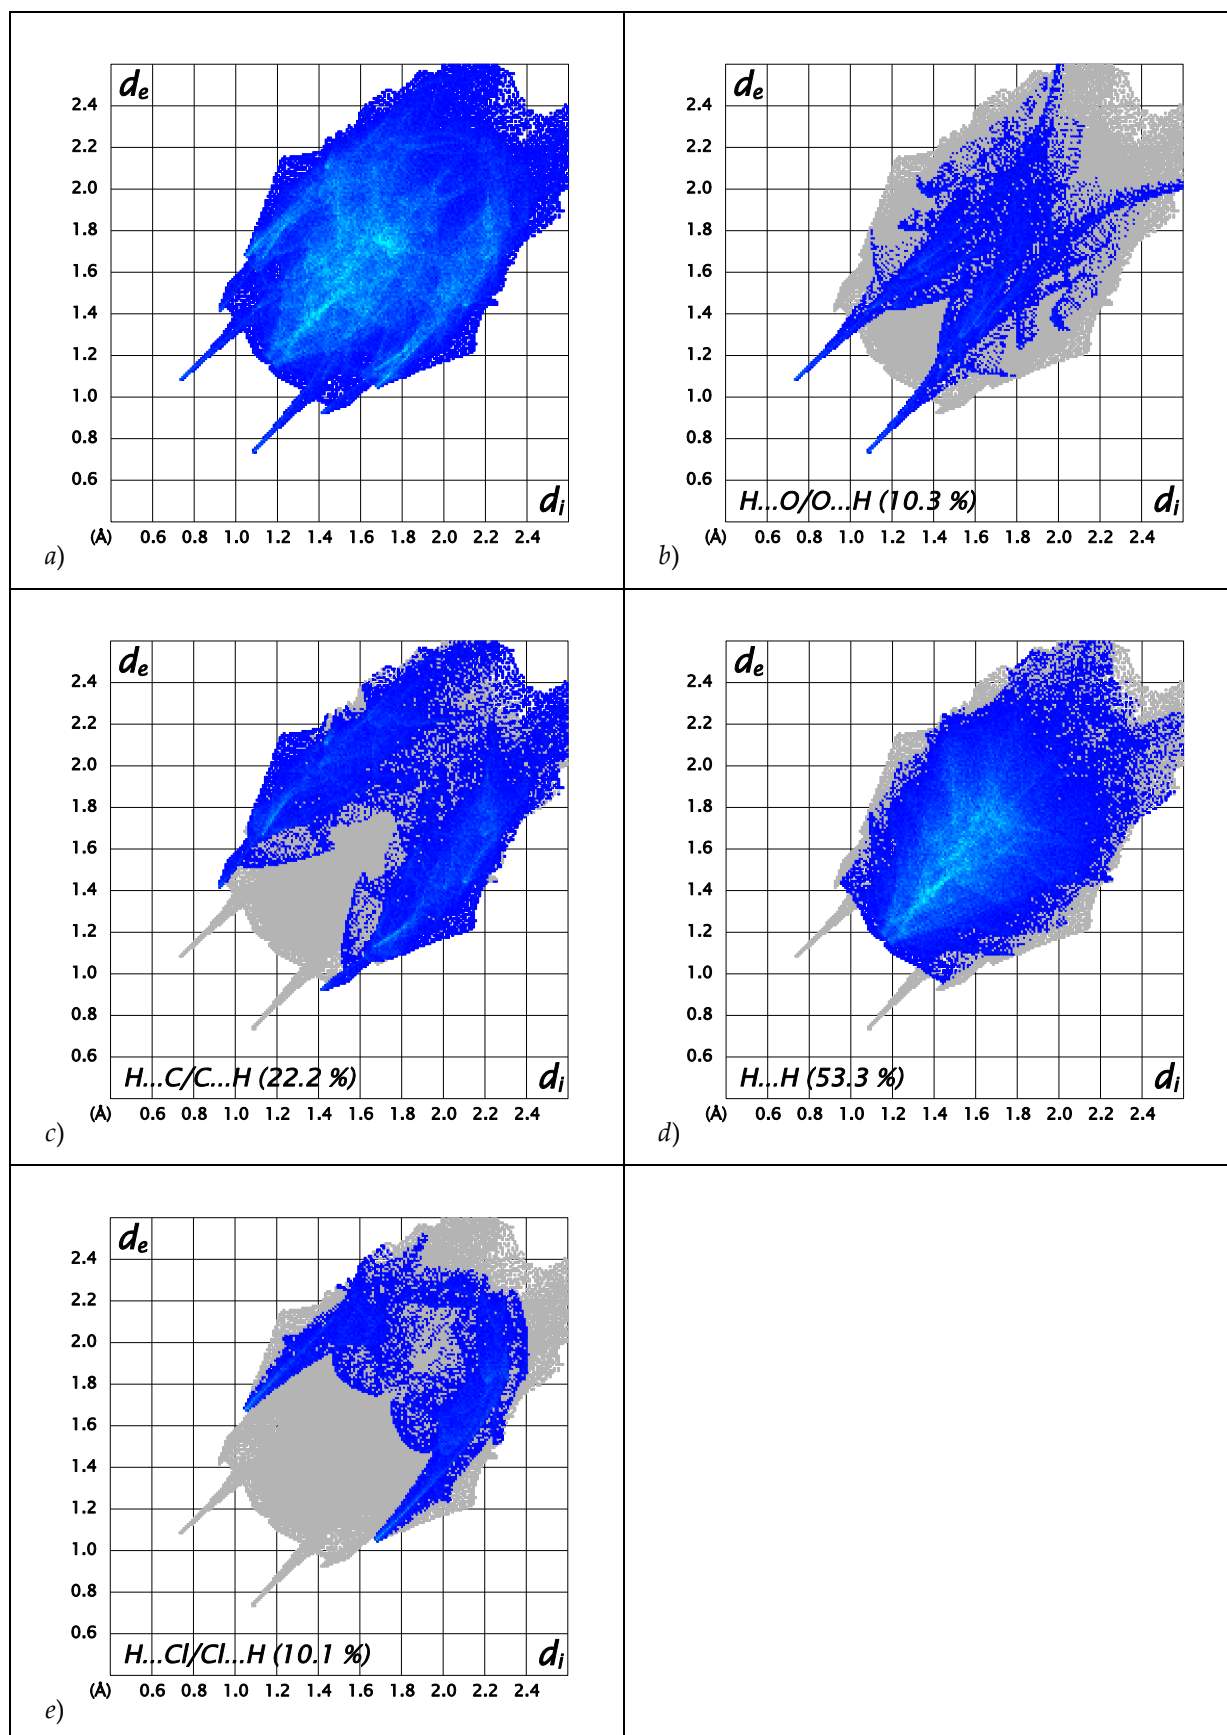

**Figure S15.** The full two-dimensional fingerprint plots of **3** (minor part), showing (a) all interactions, (b)  $H\cdots O/O\cdots H$ , (c)  $H\cdots C/C\cdots H$ , (d)  $H\cdots H$  and (e)  $H\cdots Cl/Cl\cdots H$  interactions.

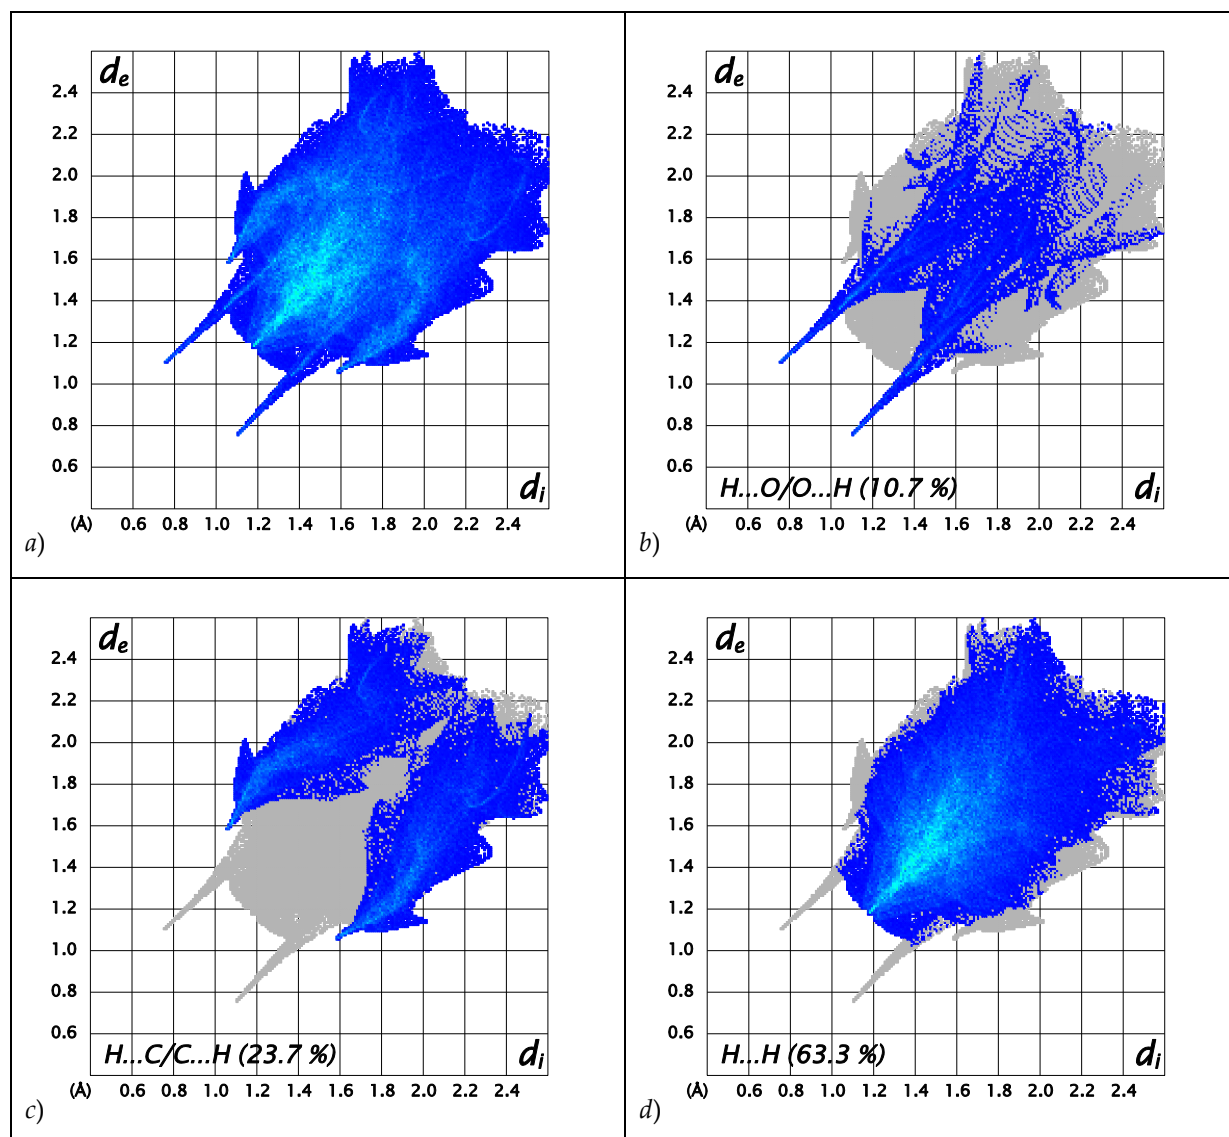

**Figure S16.** The full two-dimensional fingerprint plots of 5 (main part), showing (a) all interactions, (b)  $H\cdots O/O\cdots H$ , (c)  $H\cdots C/C\cdots H$  and (d)  $H\cdots H$  interactions.

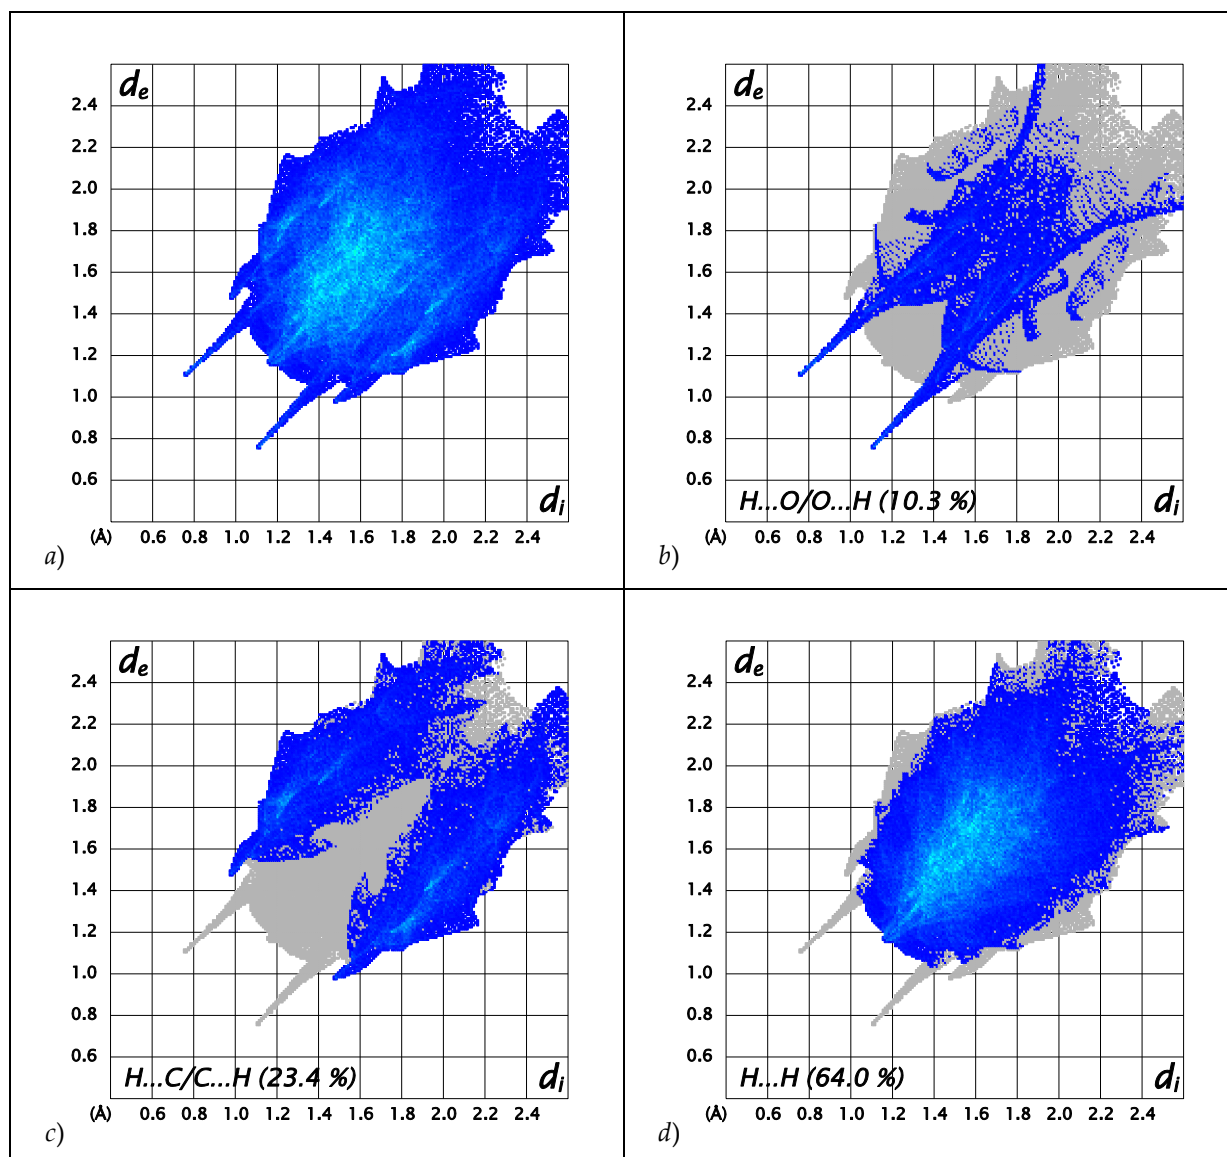

**Figure S17.** The full two-dimensional fingerprint plots of **5** (minor part), showing (a) all interactions, (b)  $H\cdots O/O\cdots H$ , (c)  $H\cdots C/C\cdots H$  and (d)  $H\cdots H$  interactions.



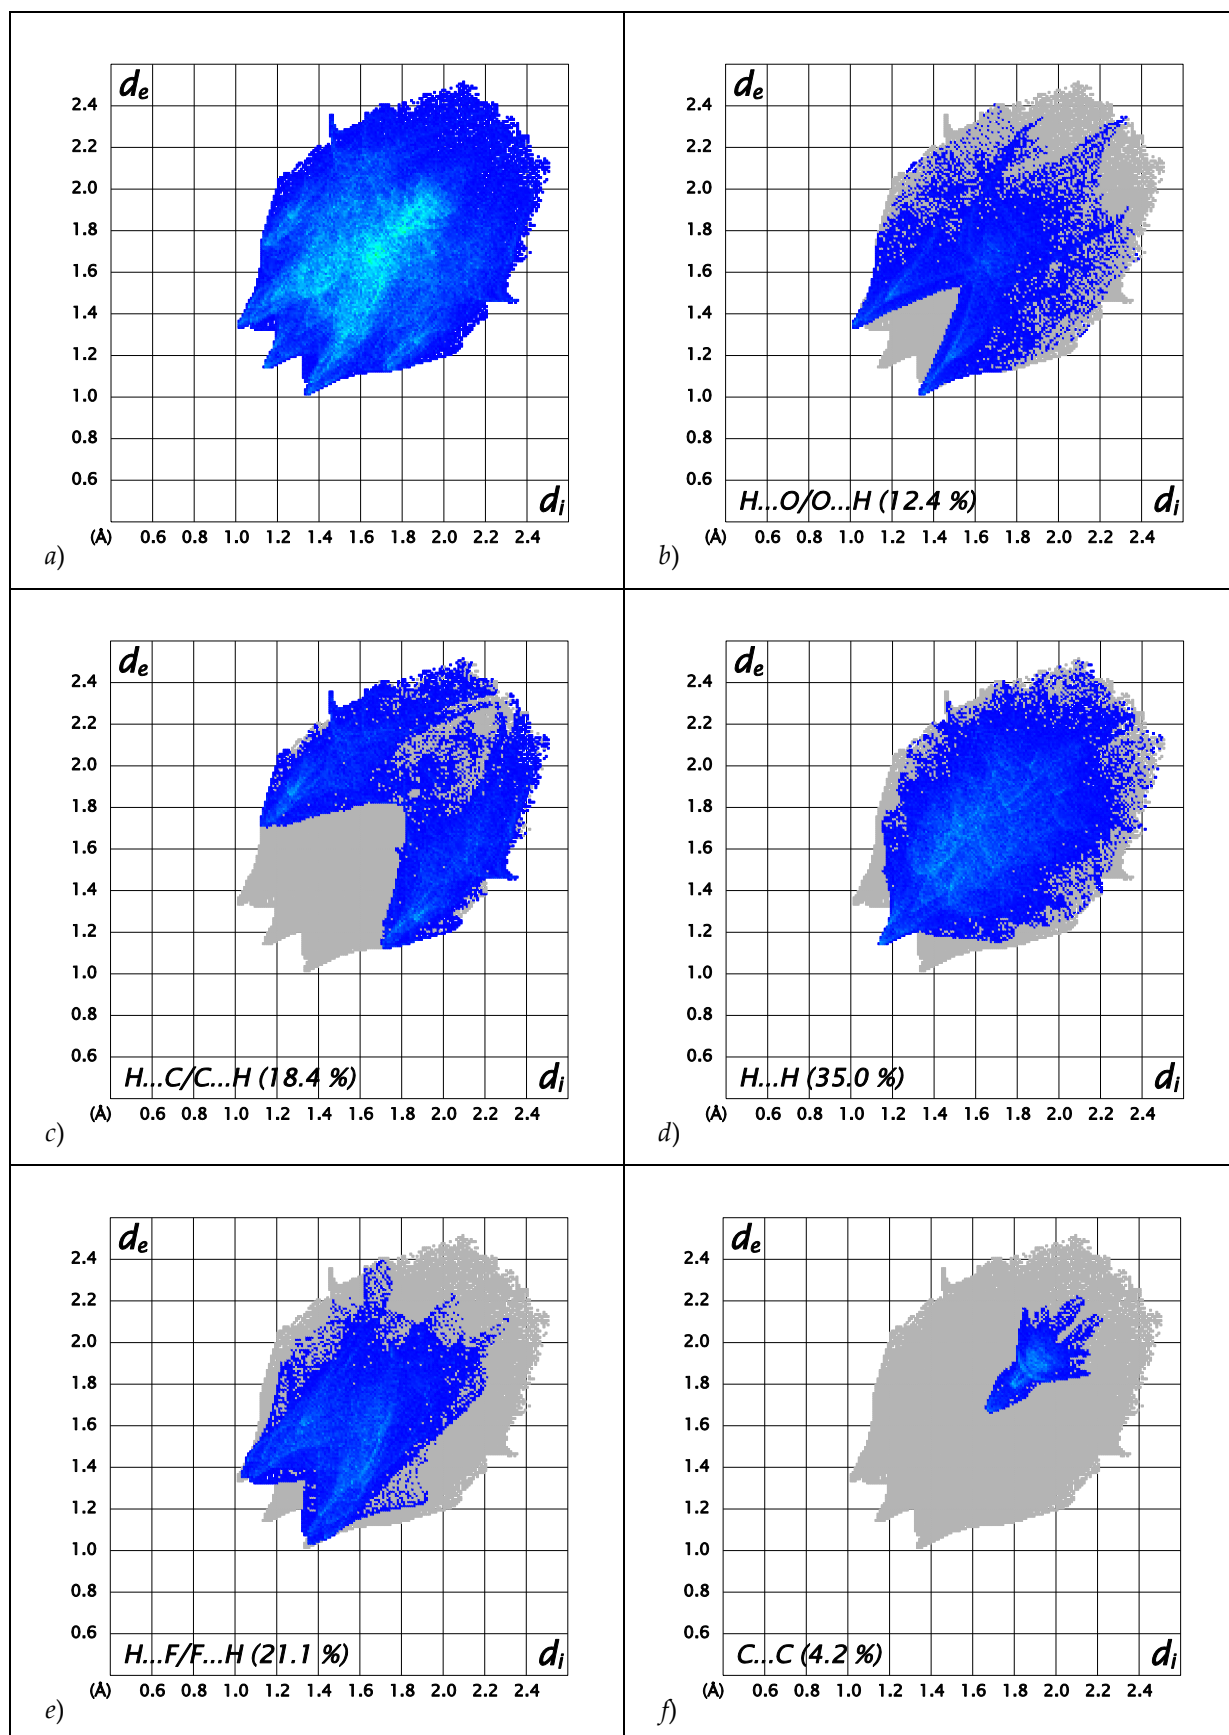

Figure S18. The full two-dimensional fingerprint plots of 2, showing (a) all interactions, (b)  $H...O/O...H$ , (c)  $H...C/C...H$ , (d)  $H...H$ , (e)  $H...F/F...H$  and (f)  $C...C$  interactions.

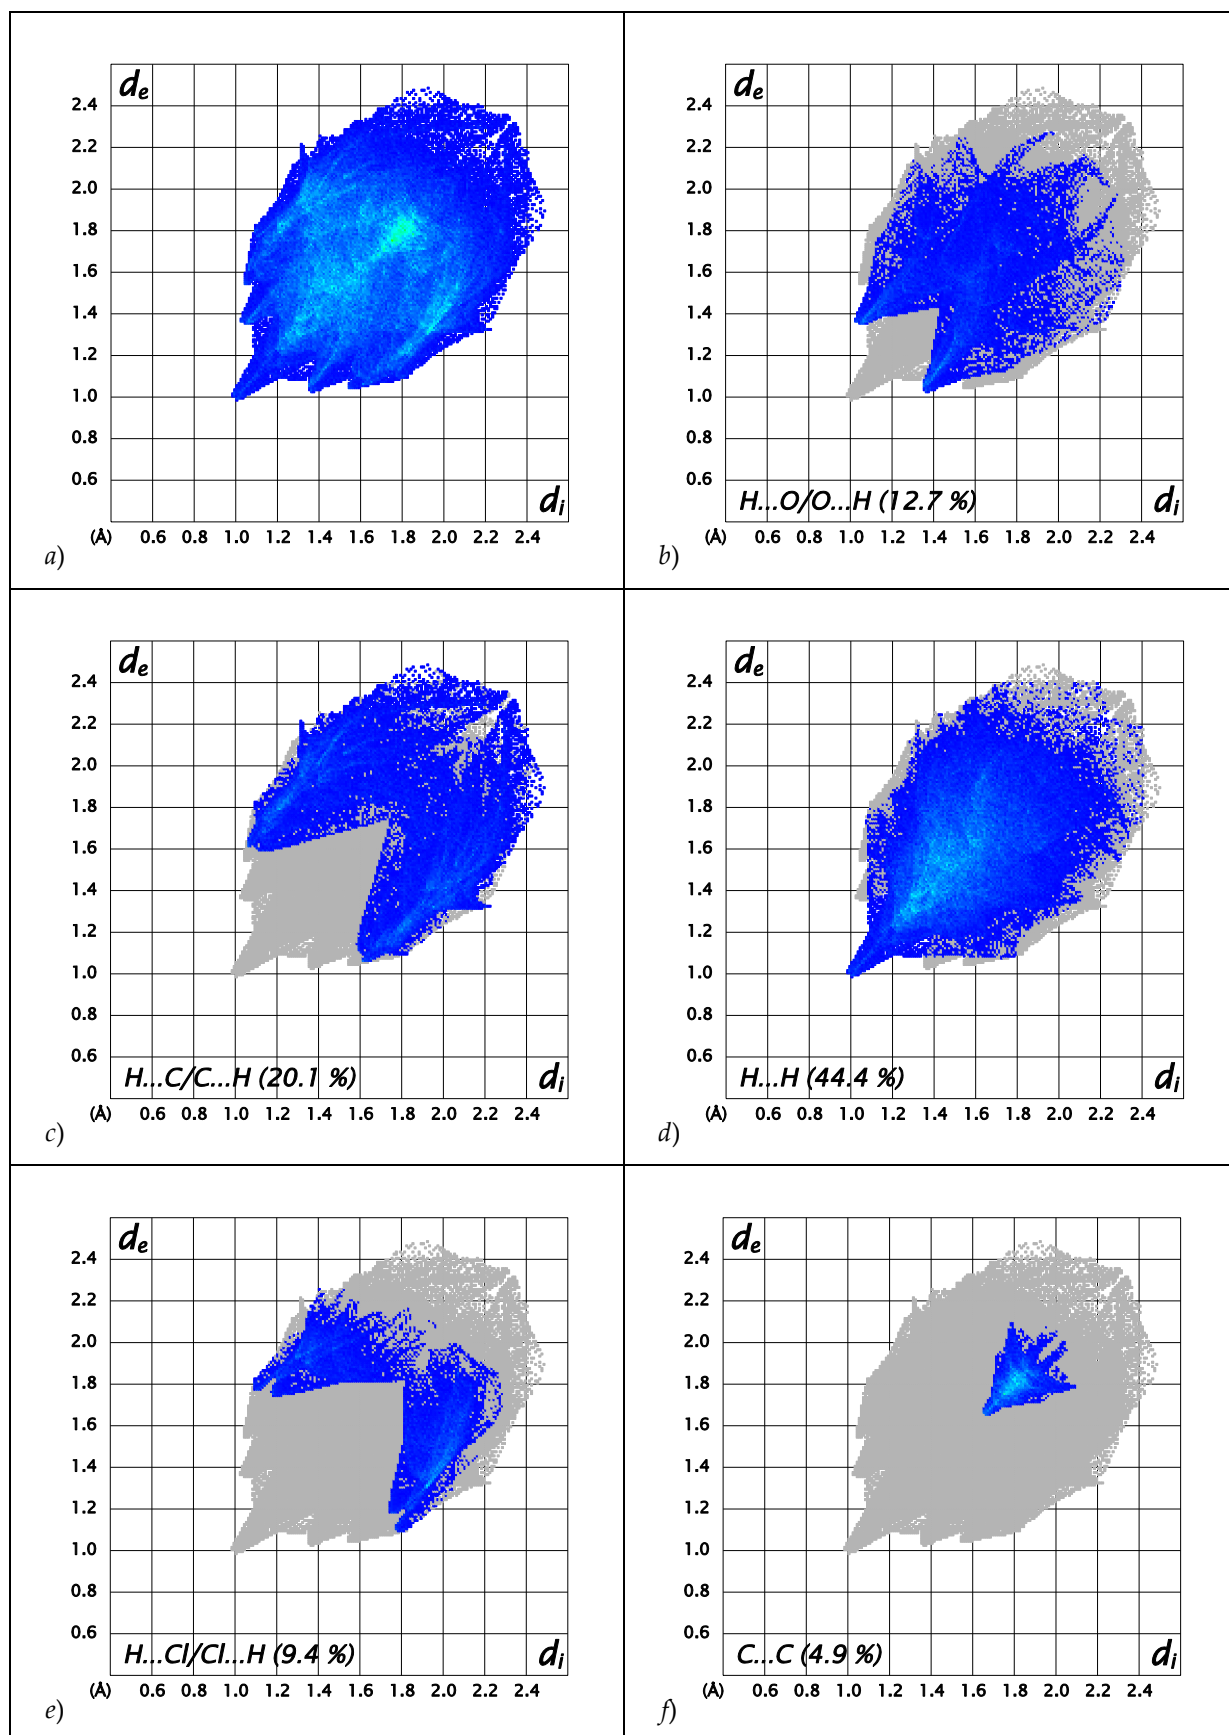

Figure S19. The full two-dimensional fingerprint plots of 4, showing (a) all interactions, (b)  $H...O/O...H$ , (c)  $H...C/C...H$ , (d)  $H...H$ , (e)  $H...Cl/Cl...H$  and (f)  $C...C$  interactions.

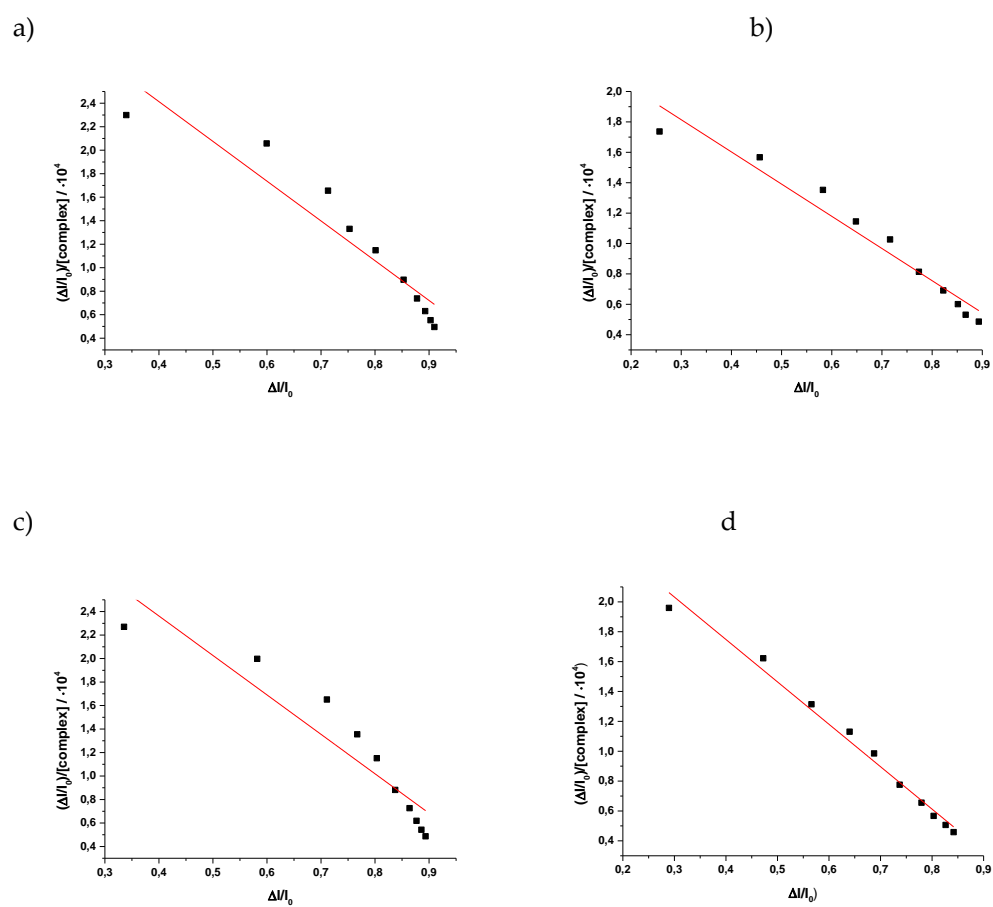

Figure S20. Scatchard plot of BSA for complex a) 1, b) 2, c) 3, d) 4.
